1 **GWAS reveals the genetic complexity of fructan accumulation patterns in barley grain**

2

3 Andrea Matros<sup>1\*</sup>, Kelly Houston<sup>2</sup>, Matthew R. Tucker<sup>3</sup>, Miriam Schreiber<sup>2</sup>, Bettina Berger<sup>4</sup>,

4 Matthew K. Aubert<sup>3</sup>, Laura G. Wilkinson<sup>3</sup>, Katja Witzel<sup>5</sup>, Robbie Waugh<sup>2,3</sup>, Udo Seiffert<sup>6</sup>,

5 Rachel A. Burton<sup>1</sup>

6

7 <sup>1</sup>ARC Centre of Excellence in Plant Energy Biology, School of Agriculture, Food and Wine,  
8 University of Adelaide, Adelaide, South Australia, Australia;

9 <sup>2</sup>Cell and Molecular Sciences, The James Hutton Institute, Dundee, Scotland, UK;

10 <sup>3</sup>School of Agriculture, Food and Wine, University of Adelaide, Waite Campus, Urrbrae, SA,  
11 Australia

12 <sup>4</sup>Australian Plant Phenomics Facility, The Plant Accelerator, School of Agriculture, Food and  
13 Wine, University of Adelaide, Adelaide, South Australia, Australia;

14 <sup>5</sup>Leibniz Institute of Vegetable and Ornamental Crops, Großbeeren, Brandenburg, Germany

15 <sup>6</sup>Biosystems Engineering, Fraunhofer IFF, Magdeburg, Saxony-Anhalt, Germany

16

17

18 **Running title:** GWAS for fructan profiles in two-row spring barley grain

19

20

21 **E-Mail addresses:**

22 [andrea.matros@adelaide.edu.au](mailto:andrea.matros@adelaide.edu.au)

23 [kelly.houston@hutton.ac.uk](mailto:kelly.houston@hutton.ac.uk)

24 [matthew.tucker@adelaide.edu.au](mailto:matthew.tucker@adelaide.edu.au)

25 [miriam.schreiber@hutton.ac.uk](mailto:miriam.schreiber@hutton.ac.uk)

26 [bettina.berger@adelaide.edu.au](mailto:bettina.berger@adelaide.edu.au)

27 [matthew.aubert8@gmail.com](mailto:matthew.aubert8@gmail.com)

28 [laura.wilkinson@jic.ac.uk](mailto:laura.wilkinson@jic.ac.uk)

29 [witzel@igzev.de](mailto:witzel@igzev.de)

30 [robbie.waugh@hutton.ac.uk](mailto:robbie.waugh@hutton.ac.uk); [robbie.waugh@adelaide.edu.au](mailto:robbie.waugh@adelaide.edu.au)

31 [udo.seiffert@iff.fraunhofer.de](mailto:udo.seiffert@iff.fraunhofer.de)

32 [rachel.burton@adelaide.edu.au](mailto:rachel.burton@adelaide.edu.au)

33

34

35 **\*Corresponding author:**

36 Andrea Matros

37 ARC Centre of Excellence in Plant Energy Biology, School of Agriculture, Food and Wine,

38 University of Adelaide, Adelaide, South Australia, Australia

39 [andrea.matros@adelaide.edu.au](mailto:andrea.matros@adelaide.edu.au)

40

41

42 **Date of submission:** 29/06/2020

43 **Figures number:** 6

44 **Tables number:** 4

45 **Supplementary data:** 15 (5 figures, 8 tables, one Suppl. Method, one Suppl. Result)

46 **Words count:** 6435 (from introduction until end of discussion)

47

48

49 **GWAS reveals the genetic complexity of fructan accumulation patterns in barley grain**

50

51

52 **Highlight:**

53 Grain fructan profiles in barley are more complex than previously expected and variations in  
54 a diversity panel relate to a genomic region where fructan biosynthesis genes cluster.

55

56

57 **Abstract**

58 We profiled the grain oligosaccharide content of 154 two-row spring barley genotypes and  
59 quantified 27 compounds, mainly fructans, that exhibited differential abundance. Clustering  
60 revealed two major profile groups where the ‘high’ set contained greater amounts of sugar  
61 monomers, sucrose and overall fructans, but lower fructosylraffinose. GWAS identified a  
62 significant association for the variability of two fructan types; neoseries-DP7 and inulin-DP9  
63 which showed increased strength when a compound-ratio GWAS was applied. Gene models  
64 within this region included five fructan biosynthesis genes, of which three (*fructan:fructan 1-*  
65 *fructosyltransferase*, *sucrose:sucrose 1-fructosyltransferase*, and *sucrose:fructan 6-*  
66 *fructosyltransferase*) have already been described. The remaining two, *6(G)-*  
67 *fructosyltransferase* and *vacuolar invertase1* have not previously been linked to fructan  
68 biosynthesis in barley and showed expression patterns distinct from those of the other three  
69 genes, including exclusive expression of *6(G)-fructosyltransferase* in outer grain tissues at  
70 the storage phase. From exome capture data several SNPs related to inulin- and neoseries-  
71 type fructan variability were identified in *fructan:fructan 1-fructosyltransferase* and *6(G)-*  
72 *fructosyltransferase* genes Co-expression analyses uncovered potential regulators of fructan  
73 biosynthesis including transcription factors. Our results provide evidence for the distinct  
74 biosynthesis of neoseries-type fructans during barley grain maturation plus new gene  
75 candidates likely involved in the differential biosynthesis of the various fructan types.

76

77

78 **Keywords:** fructans, barley, grain, neoseries, 6G-FFT, oligosaccharides, GWAS, ratio-  
79 GWAS, expression analysis

80

81

82

83 **Abbreviations:**

|     |            |                                                                |
|-----|------------|----------------------------------------------------------------|
| 84  | 1-FFT:     | fructan:fructan 1-fructosyltransferase                         |
| 85  | 1-SST:     | sucrose:sucrose 1-fructosyltransferase                         |
| 86  | 6-SFT:     | sucrose:fructan 6-fructosyltransferase                         |
| 87  | 6G-FFT:    | 6(G)-fructosyltransferase                                      |
| 88  | DAP:       | days after pollination                                         |
| 89  | DP:        | degree of polymerisation                                       |
| 90  | DM:        | dry matter                                                     |
| 91  | ELSD:      | evaporative light scattering detection                         |
| 92  | FDR:       | false discovery rate                                           |
| 93  | FOS:       | fructooligosaccharides                                         |
| 94  | FPKM:      | fragments per kilobase, per million mapped reads               |
| 95  | GWA:       | genome wide association                                        |
| 96  | GWAS:      | genome wide association study                                  |
| 97  | HAI:       | hours after imbibition                                         |
| 98  | HPAEC–PAD: | high pH anion exchange chromatography with pulsed amperometric |
| 99  |            | detection                                                      |
| 100 | HPLC:      | high performance liquid chromatography                         |
| 101 | KP:        | kestopentaose                                                  |
| 102 | KT:        | kestotetraose                                                  |
| 103 | LC:        | liquid chromatography                                          |
| 104 | LD:        | linkage disequilibrium                                         |
| 105 | LOD:       | logarithm of odds                                              |
| 106 | MAF:       | minimum allele frequency                                       |
| 107 | MS:        | mass spectrometry                                              |
| 108 | NG:        | Neural Gas                                                     |
| 109 | NS:        | neoserries-type fructan                                        |
| 110 | P:         | probability value                                              |
| 111 | PEG:       | polyethylene glycol                                            |
| 112 | QTL:       | quantitative trait loci                                        |
| 113 | RFO:       | raffinose family oligosaccharides                              |
| 114 | RT:        | retention time                                                 |
| 115 | SNP:       | single nucleotide polymorphisms                                |
| 116 | SPE:       | solid phase extraction                                         |

117 TFA: trifluoroacetic acid  
118 TPM: transcripts per million  
119 VI-1: vacuolar invertase1

120

121

## 122 **Introduction**

123 Starch, fructans and (1,3; 1,4)- $\beta$ -glucans represent the major plant reserve carbohydrates  
124 (Vijn and Smeekens, 1999; Burton and Fincher, 2009). Among them, fructan biosynthesis has  
125 evolved polyphyletically in about 15% of higher plants, including species of the orders  
126 Asterales, Buxales, Asparagales and Poales (Hendry and Wallace, 1993; Cairns *et al.*, 2000;  
127 Van den Ende, 2013). In cereals, fructans accumulate in all plant organs (Pollock and Cairns,  
128 1991).

129 Fructans consist of repeating fructose residues linked to a sucrose unit. The classification  
130 relates to the position of the sucrose, the linkage-type between the fructose residues (i.e.  
131  $\beta$ (2,1), inulin;  $\beta$ (2,6), levan; or containing both  $\beta$ (2,1) and  $\beta$ (2,6)-d-fructosyl units referred to  
132 as graminan-type) and the chain lengths (Cochrane, 2000; Matros *et al.*, 2019). Fructans can  
133 form oligomers with a degree of polymerization (DP) of 3-9 or polymers with a DP  $\geq$ 10.  
134 Here, fructans is used to indicate either fructooligosaccharides (FOS) or fructan polymers.  
135 Fructans are typically discussed in the literature without differentiation of the DP, but since  
136 they have become more important in a dietary context (Dwivedi *et al.*, 2014; Verspreet *et al.*,  
137 2015b; Liu *et al.*, 2017) more attention has recently been paid to the role of fructans  
138 according to their DP level.

139 All types of fructans are known to occur in the Poaceae (Carpita *et al.*, 1991; Pollock and  
140 Cairns, 1991; Bonnett *et al.*, 1997). However, *Triticum*, *Secale* and *Hordeum* are believed to  
141 mainly contain branched-type fructans (graminan-type) whereas the Poaceae tribe mostly  
142 comprises levan-type fructans (Bonnett *et al.*, 1997; Huynh *et al.*, 2008a). Recently, the  
143 presence of graminan- and neoseris-type fructans was reported in wheat (Verspreet *et al.*,  
144 2015c). Neoseris-type fructans, in contrast to other fructan-types, are characterised by an  
145 internal glucose unit (Matros *et al.*, 2019). Additional structural variations are likely to occur  
146 between different plant organs.

147 New developments in fructan analysis based on mass spectrometry (MS) detection revealed  
148 the fine structure of cereal grain fructans with DP3-5 (Verspreet *et al.*, 2017). Variations in  
149 fructan composition pattern and abundance were observed in oat, barley, rye, spelt and wheat

150 flour, suggesting a putative link between accumulation of certain fructan types and cereal  
151 phylogeny (Verspreet, *et al.*, 2017).

152 Reports of the beneficial health effects of fructans (Verspreet *et al.*, 2015b; Liu *et al.*, 2017;  
153 Anrade *et al.*, 2019) have prompted screens for variation in their natural abundance and  
154 composition and biotechnological approaches to increase FOS content in classical non-  
155 fructan cereals, such as maize (Dwivedi *et al.*, 2014). However, most studies on grain fructan  
156 content still focus on wheat (Huynh *et al.*, 2008a and b; Veenstra *et al.*, 2017; Veenstra *et al.*,  
157 2019). Investigation of two doubled haploid (DH) populations (Berkut x Krichauff and  
158 Sokoll x Krichauff) revealed several quantitative trait loci (QTL) for high fructan content in  
159 wheat grain (Huynh *et al.*, 2008b). Winter wheat grain fructan content was found to be  
160 significantly influenced by either the genotype or the environment as well as by genotype ×  
161 environment interactions (Veenstra *et al.*, 2019). Fructan content in developing barley grain  
162 was compared between seven genotypes, demonstrating peak accumulation between 6 and 17  
163 days after pollination (DAP) (De Arcangelis *et al.*, 2019) as previously reported (Peukert *et*  
164 *al.*, 2014). Notably, a comparative mapping approach involving wheat and barley revealed  
165 clusters of genes encoding fructan biosynthesis enzymes (Huynh *et al.*, 2012) on 7AS in  
166 wheat and 7HL in barley. These clusters included *sucrose:sucrose 1-fructosyltransferase (1-*  
167 *SST)*, *fructan:fructan 1-fructosyltransferase (1-FFT)*, *sucrose:fructan 6-fructosyltransferase*  
168 *(6-SFT)*, and several vacuolar invertases. Similar gene structures and physical positions of  
169 these clusters of functionally related genes in both genomes indicate that they may have  
170 evolved in parallel and that the genes within a cluster may be linked functionally in  
171 controlling fructan accumulation.

172 Due to its increasing potential as a health-promoting functional cereal, there is considerable  
173 interest in identifying factors that influence barley grain quality (Meints *et al.*, 2016;  
174 Langridge and Waugh, 2019). Here we report on an analysis of natural variation in fructan  
175 content and composition across a diversity panel of two-row spring barley. We identified  
176 significant associations between fructan composition/content and fructan biosynthesis genes.  
177 We obtained support for the involvement of some of these in underpinning the observed  
178 variation from transcriptomic analysis. Additionally, potential regulators of fructan  
179 biosynthesis were assigned by co-expression analyses.

180  
181  
182

## 183 **Materials and methods**

184

### 185 **Plant material**

186 We used 154 two-row spring barley genotypes sourced from The James Hutton Institute,  
187 complemented by three Australian elite barley varieties and the wheat line Piccolo as checks  
188 (Table S1). The germplasm was selected for minimum population structure while maintaining  
189 as much genomic diversity as possible based on principle components analysis of a much  
190 larger set of genotypes (>800). Three plants per genotype (biological replicates) were grown  
191 in a randomised main-unit design in a glasshouse compartment in a mix of clay-loam and  
192 cocopeat (50:50 v/v) and day/night temperatures of 22°C/15°C between July and December  
193 2014 in The Plant Accelerator, Adelaide, Australia. Mature grains were harvested and stored  
194 until oligosaccharide analysis. For each sample, five grains were ground together to a fine  
195 powder using a PowerLyzer™24 Homogenizer (QIAGEN) and used for oligosaccharide  
196 analysis immediately.

197

### 198 **Oligosaccharide extraction and profiling**

199 A 'mixed sample' was assembled composed of equal amounts from each individual sample  
200 (154 genotypes x three biological replicates) to capture systematic shifts during extraction  
201 and measurement. Soluble sugars were extracted following a method adapted from Verspreet  
202 *et al.* (2012) by incubation in 80% ethanol at 85°C for 30 min followed by Milli-Q water at  
203 85°C for 30 min on a mixer (700 rpm) in a final dilution of 1:40 (w/v, mg/μl), and  
204 supernatants combined. Extracts were diluted with water to 1:1000 (w/v, mg/μl) and 25 μl  
205 per sample analysed by high pH anion exchange chromatography with pulsed amperometric  
206 detection (HPAEC–PAD) on a Dionex ICS-5000 system using a DionexCarboPAC™PA-20  
207 column (3 x 150 mm) with a guard column (3 x 50 mm) kept at 30°C and operated at a flow  
208 rate of 0.5 ml min<sup>-1</sup>. The eluents used were (A) 0.1 M sodium hydroxide and (B) 0.1 M  
209 sodium hydroxide with 1 M sodium acetate. The gradient used was: 0% (B) from 0-2 min,  
210 20% (B) from 2-35 min, 100% (B) from 35-36.5 min, 0% (B) from 37.5-38.5 min. Detector  
211 temperature was maintained at 20°C, data collection was at 2 Hz and the Gold Standard PAD  
212 waveform (std. quad. potential) was used.

213 Data acquisition, processing, and peak integration were performed using the Chromeleon™  
214 version 7.1.3.2425 software (Thermo Scientific). Compounds were annotated based on  
215 available analytical standards. Glucose, fructose, sucrose, raffinose, 1-kestose, maltose,  
216 maltodextrin, nystose and mixtures of inulin from chicory (DP2-60) and levan from *Erwinia*

217 *herbicola* were purchased from Sigma-Aldrich, while 1,1,1-kestopentaose was obtained from  
218 Megazyme. Additional inulin and neoserine-type fructans were isolated from onions and  
219 barley grain and analysed by mass spectrometry (MS). Fructan-related chromatographic  
220 peaks were identified based on fructanase digestion and mild acid hydrolysis (Supplementary  
221 Methods). A total of 27 peaks were annotated (Table S2).

222

### 223 **Metabolic data analyses**

224 Peak area entry means and variances with respective standard deviations were calculated in  
225 Excel 2007 (Microsoft) from the 'mixed sample'-normalised integrated peak area values of  
226 the individual biological replicates for each two-row spring barley line and the check lines  
227 (Table S3). Data from at least three biological replicates were available for 143 lines. For ten  
228 lines (Agenda, Alliot, Appaloosa, Cellar, Drought, Goldie, Scarlett, Tankard, Tartan,  
229 Turnberry), data from two biological replicates were available. The mean values for the two  
230 lines with just one entry (Calgary and Saana) were replaced by the only available data.  
231 Bonferroni outlier test was performed and pair-wise correlations between the abundances of  
232 the 27 metabolites were revealed by applying the average linkage clustering method, based  
233 on Pearson correlation coefficients implemented in the MVApp (Julkowska *et al.*, 2019;  
234 <http://mvapp.kaust.edu.sa/MVApp/>). The metabolite abundances were analysed with the  
235 software package MATLAB (The MathWorks, Inc.) with a log-logistic distribution applied.  
236 The Neural Gas (NG) algorithm, implemented in MATLAB was applied for cluster analysis  
237 following Kaspar-Schoenefeld *et al.* (2016) and Peukert *et al.* (2016). Analyses were  
238 performed for the biological replicates individually and the number of NG clusters was set to  
239 four.

240

### 241 **GWAS**

242 GWAS was carried out by combing the phenotypic data for the 154 barley accessions with  
243 genotypic data generated using the Barley 50K iSelect genotyping platform (Bayer *et al.*,  
244 2017). We focused on two-row spring barley accessions to reduce the confounding effects of  
245 population structure (Comadran *et al.*, 2012) that could have been introduced by including  
246 other row types and growth habits (Darrier *et al.*, 2019). Prior to analysis any single  
247 nucleotide polymorphism (SNP) with a minimum allele frequency (MAF) of < 0.05 was  
248 removed which left 24,925 polymorphic markers for our analysis. Marker-trait association  
249 analysis was carried out using R 2.15.3 (<http://www.R-project.org>) and performed with a  
250 compressed mixed linear model (Zhang *et al.*, 2010) implemented in the GAPIT R package



251 (Lipka *et al.*, 2012). Linkage disequilibrium (LD) was calculated across the genome between  
252 pairs of markers using a sliding window of 500 markers and a threshold of  $R^2 < 0.2$  using  
253 Tassel v 5 (Bradbury *et al.*, 2007) to identify local blocks of LD, facilitating a more precise  
254 delimitation of quantitative trait loci (QTL) regions. We anchored regions of the genome  
255 containing markers that had passed the Benjamini-Hochberg threshold ( $p < 0.05$ ) as  
256 implemented in GAPIT to the barley physical map (Mascher *et al.*, 2017) using marker  
257 positions provided in Bayer *et al.* (2017) and then expanded this region using local LD  
258 derived from genome wide LD analysis as described above. Putative QTL represented by less  
259 than 5 SNPs with  $-\log_{10}(p)$  values  $< 3$  were not considered to be robust given the marker  
260 density and extensive LD present in the barley genome (Mascher *et al.*, 2017). The SNP with  
261 the highest LOD score was used to represent a significant QTL. We investigated significantly  
262 associated regions using BARLEX (<https://apex.ipk-gatersleben.de/apex/f?p=284:39>) to  
263 identify putative candidate genes. Gene annotations refer to entries in the UniProt database  
264 (<https://www.uniprot.org/uniprot/>, June 2019). Unknown genes were searched against the  
265 non-redundant entries for plants (June 2019) in the NCBI database using the BLASTX 2.9.0+  
266 software (<https://blast.ncbi.nlm.nih.gov/Blast.cgi>).

267 For compounds showing an association that passes the false discovery rate (FDR) calculated  
268 in GAPIT, ratios between these and all other compounds quantified were generated. The  
269 ratios were log transformed and then used to carry out further GWAS. The ‘p-gain’, defined  
270 as the ratio of the lowest p-value of the two individual metabolites and the p-value of the  
271 metabolite ratio (Petersen *et al.*, 2012) was then calculated. A critical value for the p-gain was  
272 derived using  $B/(2*\alpha)$ , where  $\alpha$  is the level of significance (0.05) and B the number of tested  
273 metabolite pairs. As we tested fifty-two pairs of compounds our critical value threshold was  
274  $5.2 \times 10^2$ .

275 Publicly available exome capture datasets (Mascher *et al.*, 2017) were used to identify  
276 potential causal polymorphisms in candidate genes. We only considered non-synonymous  
277 SNPs with less than 10% missing data across the set of germplasm to be informative.

278

### 279 **Gene transcript expression analyses of various developmental stages and tissues**

280 Transcript abundance of genes of interest were measured in whole germinated grain (mean  
281 data from genotypes Navigator and Admiral) and isolated Navigator grain tissues from 0 to  
282 96 hours after imbibition (hai). Aleurone tissues were divided into approximately thirds, with  
283 the proximal aleurone closest to the embryo (Betts *et al.*, 2019).

284 Data for seedling tissues (germinated embryo, root, and shoot) were obtained from the  
285 Expression Atlas organ dataset (<https://www.ebi.ac.uk/gxa/home>).  
286 Data from epidermal strips (4 weeks after sowing, W4), roots (W4), inflorescences, rachis  
287 (W5), inflorescences, lemma, inflorescences, lodicule, dissected inflorescences, palea (W6),  
288 inflorescence (10 mm), and internode, as well as for senescing leaf were obtained from  
289 BARLEX (<https://apex.ipk-gatersleben.de/apex/f?p=284:10>) (Colmsee *et al.*, 2015).  
290 A developing anther dataset was obtained from Barakate *et al.* (2020) covering four anther  
291 stages (premeiosis, leptotene/zygotene, metaphase I to tetrad, pachytene/diplotene) and two  
292 meioocyte stages (leptotene/zygotene, pachytene/diplotene). Raw expression data were  
293 mapped against the transcriptome of barley ([https://webblast.ipk-](https://webblast.ipk-gatersleben.de/barley_ibsc/downloads/)  
294 [gatersleben.de/barley\\_ibsc/downloads/](https://webblast.ipk-gatersleben.de/barley_ibsc/downloads/); merging high-confidence and low-confidence  
295 transcripts as well as isoforms) using Salmon v14.0 (Patro *et al.*, 2007).  
296 RNA-sequencing data were obtained from developing pistils at Waddington (W) stages W8,  
297 W8.5, W9, W9.5 and W10 (Wilkinson *et al.*, 2019) and are shown as a mean value for five  
298 genotypes including Golden Promise (1x replicate per stage; Aubert *et al.*, 2018), Salka,  
299 Wren, Forum and Gant (2x replicates per stage). In addition, RNA-sequencing data from  
300 individual pistil tissues including the nucellus, integuments, ovary wall, embryo sac, egg  
301 apparatus and central cell, antipodal cells, and chalaza were analysed from the Sloop  
302 genotype.  
303 Gene transcript expression data for whole developing grain (from 7 to 20 DAP) minus the  
304 embryo were generated by RNA-sequencing and are shown as a mean value from 6  
305 genotypes including Sloop (1x replicate per timepoint; Aubert *et al.*, 2018), Alabama, Pewter,  
306 Extract, Taphouse, and Hopper (1x replicate per timepoint), while isolated developing grain  
307 tissues of interest including the pericarp, aleurone, sub-aleurone, and starchy endosperm were  
308 generated from medial sections at 7 to 25 DAP for the genotype Sloop (1x replicate per  
309 timepoint).

310

### 311 **Correlation analyses of gene transcript expression**

312 Correlations among transcript abundance of fructan metabolism genes with other gene  
313 models from the QTL interval detected in the GWAS were evaluated for each of the RNA-  
314 sequencing datasets listed above, individually. Pair-wise correlations between the gene  
315 transcript expression levels were revealed by applying the average linkage clustering method,  
316 based on Pearson correlation coefficients implemented in the MVApp (Julkowska *et al.*,  
317 2019).

## 318 **Results**

319

### 320 **Grain oligosaccharide profiling revealed the abundance of fructans**

321 HPAEC-PAD chromatograms of non-structural soluble carbohydrates from mature barley  
322 grain allowed for separation of monosaccharides, disaccharides, and oligosaccharides with a  
323 DP <15 (Table 1, Figure S1). Among the latter, we identified two raffinose family  
324 oligosaccharides (RFO) and three maltose-type oligosaccharides. Most compounds were  
325 found to be fructans (Table S2), including levan-, inulin-, graminan, and NS-inulin-types. A  
326 high abundance of fructans with DP3 and DP4 was observed in mature grain extracts.  
327 Oligosaccharide profiles were obtained and evaluated from all 154 two-row spring barley  
328 lines and four checks (Table S1) and integrated peak areas extracted for 27 compounds  
329 (Table 1). The resulting data matrix was used for analyses of oligosaccharide distribution,  
330 abundance variation, metabolite correlations, and GWAS.

331

### 332 **Large variations detected in oligosaccharide profiles**

333 The abundance of most compounds followed a log-logistic distribution. Only the two most  
334 abundant compounds, sucrose and raffinose, followed a normal distribution (Figure S2).  
335 Oligosaccharide profiles were grouped separately for each of the biological replicates.  
336 Applying Neural Gas (NG) clustering to the data identified four statistically significant  
337 patterns of abundance (clusters). Each cluster can be interpreted as a prototypic abundance  
338 profile of the underlying metabolite values (Figure S3). They mainly differed in height of the  
339 normalised peak areas. Overlaps between cluster 1 and 4 and cluster 2 and 3 were detected.  
340 Samples in the latter clusters were characterised by significantly higher levels of sugar  
341 monomers and sucrose, lower fructosylraffinose and higher overall fructan values compared  
342 to clusters 1 and 4 samples (Figure S3). Accordingly, we rationalised the four clusters into  
343 two profile groups (Figure 1); cluster 1 and 4 forming profile group 1 ('low') and cluster 2  
344 and 3 forming profile group 2 ('high'). The largest peak in each sample was sucrose, whilst  
345 among the oligosaccharides, the highest values were detected for raffinose, the co-eluting  
346 fructans 1-kestose/6-kestose, nystose and the co-eluting 1&6-kestotetraose (KT,  
347 bifurcose)/6G&1-KT (NS-DP4). Generally, a higher abundance of fructans with DP3 and  
348 DP4 was observed for all accessions, and differentiation between individuals was mainly  
349 attributed to the overall abundance of all fructan types.  
350 We then assigned individual barley accessions to profile groups according to abundance  
351 profiles in each individual replicate (Table S1). Accessions with only two biological

352 replicates and mixed representation of their clusters in the two profile groups were assigned  
353 as 'mixed', as their oligosaccharide profile group was not distinct. In total 76, 77, and 5  
354 accessions were assigned to the profile groups 'low', 'high', and 'mixed' respectively.

355

### 356 **Significant correlations are observed between metabolites**

357 Of the 349 pair-wise correlations, 184 (52.72%) were highly significantly correlated ( $p <$   
358  $0.001$ ), 204 (58.45%) moderately significantly ( $p < 0.01$ ) and 228 (65.33%) were just  
359 significant ( $p < 0.05$ ) (Table S4). Several regions with highly correlated metabolites were  
360 identified in the results matrix, reflecting in many cases, biochemical relationships (Figure 2).  
361 The most significant positive correlations were observed between the various branched  
362 neoseries-type fructans as well as between the linear inulin-type fructans. Significant positive  
363 correlations were also detected between the monosaccharides and their related disaccharides  
364 as well as between the maltose-type oligosaccharides. The most significant negative  
365 correlations were detected between fructosylraffinose and fructans being highest with nystose  
366 (Figure 2).

367

### 368 **Differences in grain oligosaccharide profiles are genetically controlled in barley**

369 GWAS for variation in mature grain oligosaccharides identified a single highly significant  
370 association for two compounds, neoseries-DP7 (LOD = 8.65,  $p = 2.25 \times 10^{-9}$ ) and inulin-DP9  
371 (LOD = 6.74,  $p = 1.81 \times 10^{-7}$ ), with other less significant associations for both of these on  
372 chromosome 7H (Figure 3A). Regression of these two traits showed a high level of correlation  
373 ( $R^2 = 0.86$ , Figure 2, Table S4). Both QTL on 7H overlapped and the most significant marker  
374 from the analysis was the same, JHI-Hv50k-2016-438638 (Table 2A). This marker had  
375 adjusted p-values after FDR correction of  $p = 0.00004$  for neoseries-DP7 and  $p = 0.003$  for  
376 inulin-DP9. We anchored this QTL to the physical map (Mascher *et al.*, 2017), which based on  
377 local LD spans 3.88 MB from 174,327 (JHI-Hv50k-2016-435062) to 4,056,691 bases (JHI-  
378 Hv50k-2016-439312).

379 In total 194 gene models were detected within the QTL, of which 65 are unannotated (Table  
380 S5). The highest number of annotated gene models was involved in protein modification (32)  
381 and degradation (17) (Figure 3B) with others involved in transcription/translation (27),  
382 lipid/sterol/terpenoid metabolism (12), transcription factors (TFs) (11), or carbohydrate  
383 metabolism (11). Among the latter category, we identified five candidates that could influence  
384 fructan content (Table 2B). These included HORVU7Hr1G000250.3,  
385 HORVU7Hr1G000260.2, and HORVU7Hr1G001040.6, which were genetically similar or

386 identical to *I-FFT*, *I-SST* and *6-SFT* from *Hordeum vulgare*, respectively. Of the two others,  
387 HORVU7Hr1G000270.1 was similar to *6(G)-fructosyltransferase (6G-FFT)* from *Aegilops*  
388 *tauschii*, and HORVU7Hr1G001070.17 to *vacuolar invertase1 (VI-1)* from *Triticum*  
389 *monococcum*.

390 To further explore relationships between compounds we used a hypothesis-free analysis of  
391 metabolite ratios in a GWAS. This analysis generates a ‘p-gain’ statistic which is calculated  
392 from the significance of increases in  $-\log_{10}(p)$  values of the metabolite ratios compared to an  
393 estimated threshold derived from the p-values obtained in GWAS of the individual compounds  
394 (Petersen *et al.*, 2012). Using the Log transformed ratios between neoseries-DP7 and inulin-  
395 DP9 with all other compounds, 17 pairs of compounds correlated with a QTL that passed the  
396 FDR threshold of  $-\log_{10}(p)$  6.02 in the same region of chromosome 7H as neoseries-DP7 and  
397 inulin-DP9 alone. The ratios of neoseries-DP7:inulin-DP10, inulin-DP9:neoseries-DP8 and  
398 inulin-DP9:inulin-DP10 passed the p-gain threshold of  $5.2 \times 10^2$  ( $p < 0.05$ ) for markers with a  
399 MAF of  $> 10\%$  with  $1.97 \times 10^5$ ,  $4.08 \times 10^9$  and  $3.71 \times 10^3$ , as well as  $1.93 \times 10^5$  and  $6.43 \times 10^5$ ,  
400 respectively (Table 3, Figure S4), indicating metabolic links between these compounds. The  
401 QTL on 7H overlapped for all ratios. Significant markers identified were SCRI\_RS\_8079, JHI-  
402 Hv50k-2016-435510, and JHI-Hv50k-2016-438638, the latter being the same as identified with  
403 the metabolite concentrations for neoseries-DP7 and inulin-DP9 alone (Table 2A). GWAS for  
404 the ratio neoseries-DP7:inulin-DP9 did not identify any significant associations (Table 3).

405

#### 406 **Evaluation of exome capture data revealed several non-synonymous SNPs**

407 Mascher *et al.* (2017) presented exome capture data for 25 of the genotypes included in our  
408 study, which we evaluated to identify putative casual SNPs for our five regional candidates  
409 involved in fructan biosynthesis. Eight non-synonymous SNPs in *I-FFT*, three in *VI-1*, two in  
410 *6G-FFT*, and one in *I-SST* were identified (Table S6). All identified SNPs are located within  
411 functional protein coding regions of the genes (Figure 4). Changes in just one out of 25  
412 genotypes were observed for three markers among the eight SNPs detected in *I-FFT*. The  
413 other five SNPs in *I-FFT* represent changes from methionine to leucine (position 7H\_  
414 262685), alanine to threonine (7H\_263547 and 7H\_263700), isoleucine to threonine  
415 (7H\_264127), and leucine to isoleucine (7H\_264198). They showed significant effects ( $p <$   
416  $0.05$ ) on 1-kestose and several neoseries-type fructans (Figure S5). The two SNPs in *6G-FFT*  
417 were in LD and represent changes from glycine to glutamic acid (7H\_321608), and alanine to  
418 threonine (7H\_319284). Notably, they have a significant effect on 1-kestose and several  
419 inulin-type fructans (Figure S5). However, the SNP in *I-SST*, representing a change from

420 threonine to isoleucine (7H\_279526), as well as the three SNPs in *VI-1*, representing changes  
421 from glutamic acid to aspartic acid (7H\_2423349), tryptophan to arginine (7H\_2425560), and  
422 arginine to cysteine (7H\_2425578), did not show a significant effect on either trait. For *6-SFT*  
423 no SNP was identified.

424

### 425 **Fructan biosynthesis genes show developmental stage and tissue specific expression** 426 **patterns**

427 We compared expression patterns of the five candidate genes (Table 2) and three known  
428 fructan hydrolyase encoding genes in various tissues across barley plant development (Figure  
429 5). In the vegetative phase, highest expression for *I-SST* (facilitating the biosynthesis of 1-  
430 kestose, the precursor for production of inulin- and graminan-type fructans) was observed  
431 during early germination in embryo and all seedling tissues (Figure 5A). During the  
432 reproductive phase, *I-SST* is expressed in all vegetative tissues with peak expression in the  
433 leaf epidermis, as well as in all reproductive tissues and stages with a pronounced peak of  
434 expression in the ovary wall, the embryo sac (ES), the egg apparatus and central cell  
435 (EC+CC), and the antipodal cells (ANT) during late pistil development (stages W8 to W10,  
436 Figure 5B). In the grain development phase, *I-SST* expression is highest in the early stages (7  
437 to 9 DAP) in maternal grain tissues (pericarp, aleurone, sub-aleurone/outer starchy  
438 endosperm (SA)) while decreasing during the storage stage (from 11 DAP onwards) in all  
439 tissues (Figure 5C). *I-FFT* (mediating the biosynthesis of inulin-type fructans) showed tight  
440 co-expression with *I-SST* during early germination in embryo and all seedling tissues (Figure  
441 5A) as well as all vegetative tissues (Figure 5B), while in reproductive (Figure 5B) and grain  
442 tissues (Figure 5C) much lower expression levels were observed. In contrast, *6-SFT*  
443 (mediating the biosynthesis of graminans-type fructans) showed very tight co-expression with  
444 *I-SST* during meiosis and pistil development (Figure 5B) as well as at early grain  
445 development (Figure 5C). During germination, *6-SFT* expression was extremely low while it  
446 was observed to be moderate in seedling (Figure 5A) and all vegetative tissues (Figure 5B).  
447 Notably, expression of *6G-FFT* (mediating the biosynthesis of neoseris-type fructans) was  
448 restricted to the outer grain tissues (see aleurone tissues in Figure 5A and aleurone, pericarp  
449 and endosperm tissues in Figure 5C) during late grain development (from 11 DAP onwards).  
450 *VI-1*, with yet unknown function, showed low expression levels in germinated grain tissues,  
451 all vegetative tissues, in pericarp at late grain development and senescing leaf, while higher  
452 levels were notable during late pistil development (Figure 5). Among the fructan hydrolyases,  
453 *I-FEH* (HORVU6Hr1g011260) and *6-FEH* (HORVU2Hr1G109120) seem to be involved in



454 balancing fructan biosynthesis, with *1-FEH* tightly co-expressed with *1-SST* in all tissues and  
455 stages and pronounced *6-FEH* expression during the reproductive phase in all tissues and in  
456 the pericarp at late grain development. In contrast, only marginal expression levels were  
457 observed for *6-FEH/CWI2* (HORVU2Hr1G118820) (Figure 5).

458

### 459 **Fructan biosynthesis genes show differential co-expression patterns in developing barley** 460 **grain**

461 Besides the five fructan biosynthesis genes, the association of differential oligosaccharide  
462 profiles with other candidates in the identified genomic region may be possible. We  
463 hypothesised similar expression patterns for fructan biosynthesis genes and other candidates  
464 influencing the fructan levels in barley. Therefore, transcript expression levels were evaluated  
465 for all gene models within the QTL interval and co-expression of genes was assessed  
466 individually within the developmental phases and tissues (Table S7). We have focused on  
467 developing barley grain and significant correlations for the expression of fructan metabolism  
468 genes with each other and with TFs (Table 4).

469 Highly positive correlations among the fructan metabolism genes were observed between *1-*  
470 *FFT*, *1-SST* and *6-SFT*; between *6G-FFT* and *6-FEH*; and for *1-FEH* with *1-FFT*, and *6-*  
471 *FEH*. Notable negative correlations were observed for *6G-FFT* with *1-FFT*, and *1-SST*.  
472 Co-expression patterns with TFs were highly similar for *1-FFT*, *1-SST* and *6-SFT* in the  
473 developing grain. Notable positive correlations for *1-FFT*, *1-SST* and *6-SFT* expression were  
474 identified with the *WD\_REPEATS\_REGION domain-containing protein*  
475 (HORVU7Hr1G000820.1), the *ALWAYS EARLY 3* (HORVU7Hr1G001120.1), and the two  
476 *scarecrow-like protein* genes (HORVU7Hr1G001300.3, HORVU7Hr1G001310.1). In  
477 contrast, *6G-FFT* showed significant negative correlations with the *WD\_REPEATS\_REGION*  
478 *domain-containing protein* (HORVU7Hr1G000820.1), *scarecrow-like protein 22*  
479 (HORVU7Hr1G001310.1), and *HTH myb-type domain-containing protein*  
480 (HORVU7Hr1G001830.3). Significant positive correlations for *VI-1* were observed in  
481 developing grain with the *protein ALWAYS EARLY 3* (HORVU7Hr1G001120.1) and  
482 *scarecrow-like protein 22* (HORVU7Hr1G001310.1), as observed for *1-FFT*, *1-SST*, and *6-*  
483 *SFT*. *1-FEH* showed co-expression patterns partly like those observed for *1-FFT*. Besides the  
484 positive correlation with a *myb-type transcription factor* (HORVU7Hr1G001830.3) a strong  
485 negative correlation with the *AP2/ERF domain-containing protein* (HORVU7Hr1G001050.1)  
486 and a positive interaction (not significant) with a *NAC domain-containing protein gene*  
487 (HORVU7Hr1G000910.1) were identified. Highest positive correlations were noted for *6-*

488 *FEH* with *6G-FFT* and the *HTH myb-type domain-containing protein*  
489 (HORVU7Hr1G001830.3), which in contrast was negatively associated with *6G-FFT* (Table  
490 4).

491 Additional and partly different patterns for the co-expression of fructan metabolism genes with  
492 other genes were observed across a range of developmental phases and tissues (Table S7,  
493 Supplementary results).

494  
495

## 496 **Discussion**

497

### 498 **Neoseries-type fructans are abundant in mature barley grain**

499 Profiling of DP3 to DP10 oligosaccharides revealed the abundance of 6G-kestose and higher  
500 DP neoseries-type fructans in mature barley grain (Table 1, Figure S1, Table S2). While the  
501 presence of 6G-kestose has been reported in wheat and barley grain (Nilsson *et al.*, 1986;  
502 Henry and Saini, 1989) higher DP variants of this fructan-type have not been previously  
503 identified. Recent studies revealed the presence of neoseries-type fructans in oat, rye, spelt  
504 and wheat flour (Verspreet *et al.*, 2015b; Verspreet *et al.*, 2017) but claimed its absence in  
505 barley (Verspreet *et al.*, 2017). These contrasting observations may be explained both by the  
506 plant materials used (flour vs. whole grain) and the technical constraints of fructan profiling.  
507 Noticeable accumulation of unidentified higher DP fructans was reported for the outer  
508 pericarp of developing wheat grain (Schnyder *et al.*, 1993). Thus, utilising whole grain here  
509 may have facilitated the detection of neoseries-type fructans in barley, likely accumulating in  
510 outer grain parts as suggested by expression analysis for *6G-FFT* (Figure 5). Additionally,  
511 electronic properties of PAD, typically used for fructan profiling, require higher  
512 concentrations for the detection of higher molecular weight fructans (Rocklin and Pohl,  
513 1983), resulting in a pronounced log-logistic distribution for those compounds that is also  
514 observed in our study (Figure S2) and which may have led to the underrepresentation of  
515 fructans with >DP4 in other studies. In the future, comprehensive grain fructan profiling  
516 could be improved by employing recently established LC-MS methodologies, as reviewed in  
517 Matros *et al.* (2019).

518

### 519 **Barley accessions group according to their oligosaccharide accumulation patterns**

520 Reported genotypic variation in grain fructan content ranges from 0.9-4.2% of dry matter  
521 (DM) among 20 barley breeding lines (Nemeth *et al.*, 2014) and from 1.1-1.6% of DM



522 among seven barley cultivars (De Arcangelis *et al.*, 2019). These results correspond well with  
523 the variability for total fructan values (0.02-1.94% of grain dry weight) determined here.  
524 When discriminating between different chain lengths Henry and Saini (1989) measured  
525 varying amounts of FOS with 0.26% (DP3), 0.2% (DP4), 0.03% (DP5) and 0.23% of DM  
526 (>DP5) in mature barley grains, which was confirmed by results from Jenkins *et al.*, (2011).  
527 In our study, the lowest abundance range showed FOS with DP5 (traces to 0.16% of DM)  
528 while FOS with DP3 and DP4 ranged from 0.02-0.53% and traces to 0.44% of DM,  
529 respectively. Nemeth *et al.*, (2014) observed a positive correlation between fructan values  
530 and the content of long chain fructans (> DP9,  $r = 0.54$ ,  $p = 0.021$ ). However, such an  
531 association could not be found in our dataset. Clustering of the oligosaccharide profiles from  
532 the 154 lines revealed two major profile groups, one each of higher and lower sugar values  
533 (Figure 1). We detected significant positive correlations between biosynthetically closely  
534 related metabolites (e.g. within and between the different fructan-types) with negative  
535 associations for antagonistic compounds (e.g. fructosylraffinose with all fructans, sugar  
536 monomers and dimers, Figure 2). Co-occurrence of fructans and RFO has been reported for  
537 many plant species including wheat (Haska *et al.*, 2008) and barley (Henry, 1988), with the  
538 proposal that strong RFO and fructan accumulation do not occur together in a single plant  
539 species (Van den Ende, 2013). Notably, fructosylraffinose was only speculated to occur in  
540 barley (Cerning and Guilbot, 1973), while its presence was described in wheat decades ago  
541 (White and Secor, 1953; Saunders, 1971).

542

### 543 **Differences in oligosaccharide profiles are genetically controlled in barley**

544 A significant QTL on chromosome 7H affecting barley grain fructan levels was identified  
545 (Figure 3A) and five genes involved in fructan metabolism were detected in this region  
546 (Table 2 and Table 3, Table S5). We increased the power of GWAS by analysing metabolite  
547 ratios using the p-gain approach. As the p-gain passed an appropriate threshold (defined by  
548 the data), using ratios provided more information about the traits, and the genomic locus  
549 underlying them, than looking at the traits individually. Using ratios reduces background  
550 ‘noise’ in datasets, increasing statistical power to detect significant associations between  
551 traits and genomic loci (Petersen *et al.*, 2012). Previous studies have demonstrated that  
552 including ratios between pairs of traits can strengthen associations identified and uncover  
553 novel information about biochemical pathways (Gieger *et al.*, 2008; Illig *et al.*, 2010; Suhre  
554 *et al.*, 2011). Thus, ratio-GWAS represents an innovative approach for the discovery of new  
555 biologically meaningful associations in plants, as shown for the linked oligosaccharide

556 pathways described here. However, when we used the ratio between neoseries-DP7:inulin-  
557 DP9 in the GWAS we did not identify an association on 7H, indicating less information  
558 provided by the ratios than the individual values. This may relate to the high positive  
559 correlation of these two compounds across the barley lines ( $R^2 = 0.86$ , Figure 2, Table S4)  
560 and the close genomic location of the related fructan biosynthesis genes (Table 2). In  
561 contrast, for the ratios between inulin-DP7:inulin-DP10 ( $R^2 = 0.011$ ,  $p = 0.80$ ), inulin-  
562 DP9:neoseries-DP8 ( $R^2 = 0.56$ ,  $p < 0.05$ ) and inulin-DP9:inulin-DP10 ( $R^2 = 0.028$ ,  $p = 0.54$ ) a  
563 significant QTL was identified. This points towards a stronger association between the  
564 identified genomic locus and the molecular weight of the fructans than with the fructan  
565 structure.

566 In wheat, two loci for differential total fructan contents in grain were identified on  
567 chromosomes 7A and 6D, which did not show significant interactions (Huynh *et al.*, 2008b).  
568 Subsequent physical mapping provided indications for clustering of fructan biosynthesis  
569 genes in the genomes of both dicots as well as monocots (Huynh *et al.*, 2012). For wheat and  
570 barley the formation of a functional cluster was shown containing *I-SST* (provided are the  
571 IDs of the most probable barley gene product; J7GM45\_HORVV), *I-FFT*  
572 (J7GHS0\_HORVV), and *6-SFT* (Q96466\_HORVU) (Huynh *et al.*, 2012), which were also  
573 identified here. Additionally, the authors found two *vacuolar invertase (VI)* genes  
574 (J7GIU6\_HORVV, J7GR98\_HORVV) in this cluster, of which we identified one, which is  
575 similar to *6G-FFT* (J7GIU6\_HORVV). The identification of *6G-FFT* matches the detection  
576 of neoseries-type fructans in our study. Among the five candidates we identified was also a  
577 gene coding for an uncharacterised gene product (M0X3V0\_HORVV) which is similar to a  
578 *VI-1* from *T. monococcum* (Q6PVN1\_TRIMO) that has not been described or annotated in  
579 barley before.

580 The evaluation of exome capture data (Mascher *et al.*, 2017) led to the identification of  
581 several significant SNPs in the five fructan biosynthesis genes. SNPs in *I-FFT* were  
582 associated with grain neoseries-type fructan content while SNPS in *6G-FFT* were associated  
583 with inulin-type fructan content (Figure 4, Table S6). Ideally, the influence of these SNPs  
584 would be validated in the complete set of germplasm used to quantify fructan content. This  
585 analysis would likely reveal additional SNPs that have not been identified in this subset of  
586 lines.

587

588

589

## 590 **Developmental and tissue specific nature of barley fructan biosynthesis**

591 Throughout plant development, *I-SST*, *I-FFT* and *I-FEH* showed strong co-expression,  
592 starting in embryo tissue during germination, accompanied later by *6-SFT* expression in root,  
593 leaf and stem, likely leading to the biosynthesis of inulin- and graminan-type fructans in  
594 those tissues until senescence (Figure 5). These observations matched the consensus of  
595 inulin- and graminan-type fructans being the predominant polymers in barley tissues (Pollock  
596 and Cairns, 1991; Bonnett *et al.*, 1997; Huynh *et al.*, 2008a). Accordingly, *I-SST*, *I-FFT*, *6-*  
597 *SFT* and *I-FEH* are the best studied fructan biosynthesis genes (Duchateau *et al.*, 1995;  
598 Henson, 2000; Lüscher *et al.*, 2000; Huynh *et al.*, 2012). A key role was assigned to *I-SST*  
599 (Wagner *et al.*, 1983) and correlated transcription and activity was reported for *I-SST* and *6-*  
600 *SFT* in barley leaves (Nagaraj *et al.*, 2004). A role for fructans as a temporal carbohydrate  
601 reserve has been widely accepted in vegetative tissues and roots (Pollock *et al.*, 1996; Vijn  
602 and Smeekens, 1999; Housley, 2000) and can be assumed for the inulin and graminan-type  
603 fructans in barley.

604 We observed co-expression of *I-SST*, *6-SFT*, *6-FEH*, and *I-FEH* in reproductive tissues with  
605 a pronounced peak during late pistil development in ovary tissues (Figure 5B) probably  
606 leading to specific accumulation of graminan-type fructans. In *Campanula rapunculoides*, the  
607 largest inulin-type fructan concentrations were found in petals and ovaries (Vergauwen *et al.*,  
608 2000). Based on the observation that petals in daylily (*Heemerocallis*) (Bieleski, 1993) and *C.*  
609 *rapunculoides* (Vergauwen *et al.*, 2000) and leaves of *Phippisia algida* (Solhaug and Aares,  
610 1994) rapidly degrade fructans upon flower opening, a role for them in flower expansion was  
611 suggested. However, the function of the different fructan-types accumulating in *C.*  
612 *rapunculoides* ovary (inulin-type) and barley ovary tissues (graminan-type) remains  
613 unresolved at present. Also, the newly identified *VI-1* showed peak expression specific to  
614 ovary tissues at late pistil development, while its function in fructan biosynthesis remains  
615 unclear.

616 In accordance with the detection of neoseris-type fructans and the identification of *6G-FFT*  
617 in the significant QTL region we observed *6G-FFT* expression in barley grain (Figure 5A and  
618 C). Notably, its expression was restricted to developing grain from 11 DAP onwards and  
619 confined to the outer endosperm and maternal tissues. Reports on this fructan type in  
620 developing grains of other cereals do not exist to our knowledge. Accumulation of neoseris-  
621 type fructans in the aleurone of mature grain may be related to favourable structural  
622 characteristics when compared to inulins and graminans and to the function of this tissue  
623 during germination. Some reports showed that fructan branching architecture is critical to

624 physicochemical properties, such as water solubility or formation of aggregates at high  
625 concentration (Eigner *et al.*, 1988; Wolff *et al.*, 2000; Ponce *et al.*, 2008). The more compact  
626 shape of neoseries-type fructans would allow higher concentrations to be stored in the  
627 desiccated aleurone. Better water solubility and pH-stability of neoseries-type fructans would  
628 be advantageous during germination, when the aleurone hydrates and enzymes must be  
629 quickly activated and reach their substrates. Proving these hypotheses will require the  
630 comparative evaluation of physicochemical properties of neoseries- inulin- and graminan-  
631 type fructans in the future. Indeed, several studies have provided strong evidence for a  
632 positive relationship between enhanced fructan concentrations with better malting  
633 characteristics in barley varieties (Smith *et al.*, 1980; Cozzolino *et al.*, 2016 and references  
634 therein)

635

### 636 **Potential regulators of barley grain fructan biosynthesis**

637 Despite the increasing evidence of tissue specificity, there is limited knowledge of how fructan  
638 metabolism is orchestrated to adjust the storage and use of photosynthates during grain  
639 development. Within the significant QTL interval, we found several genes differentially co-  
640 expressed with the various fructan biosynthesis genes in developing grain. Among them were  
641 several TFs (Table 4, Table S7, Figure 6).

642 It is generally agreed that initiation of fructan biosynthesis is triggered by an organ-specific  
643 sucrose threshold (Lu *et al.*, 2002, Jin *et al.*, 2017). Also, several molecular components in  
644 sucrose-mediated induction of plant fructan biosynthesis, such as protein phosphatases and  
645 kinases (Noël *et al.*, 2001), second messenger  $\text{Ca}^{2+}$  (Martinez-Noël *et al.*, 2006), small GTPases  
646 and phosphatidylinositol 3-kinase (Ritsema *et al.*, 2009), as well as the plant hormones abscisic  
647 acid and auxin (Valluru, 2015) were shown to be required for activation of fructosyltransferase  
648 genes.

649 An opposing sugar-sensing system was recently identified in barley, whereby a single gene on  
650 chromosome 2H encodes two functionally distinct TF variants [SUSIBA (sugar signaling in  
651 barley) 1 and 2], which respond differently to sucrose concentrations (Jin *et al.*, 2017).  
652 However, no distinction was made between different tissues and fructan types and it remains  
653 unclear if this system coordinates fructan and starch biosynthesis in general.

654 In wheat, TaMYB13, a R2R3-MYB TF, was described as a transcriptional activator of fructan  
655 biosynthesis (Xue *et al.*, 2011; Kooiker *et al.*, 2013). In the promoter of the barley genes *1-*  
656 *FFT*, *1-SST*, *6-SFT* and *VI*, binding motifs for TaMYB13 were identified, suggesting that the  
657 co-expression of these genes may be driven by a TaMYB13 homolog (Huynh *et al.*, 2012).

658 However, the *HTH myb-type domain-containing protein* (HORVU7Hr1G001830.3) identified  
659 here did not show similarity to TaMYB13 and we could not observe a clear homolog in barley.  
660 While three myb-type TFs were also described to activate promoters of genes involved in  
661 fructan biosynthesis and degradation in chicory (Wei *et al.*, 2017a and b), involvement of other  
662 TF family genes has not yet been reported.

663

## 664 **Conclusions**

665 A new genomic region and several causal SNPs involved in the regulation of barley grain  
666 fructan content were identified. The genomic region includes a physical cluster of  
667 functionally related fructan biosynthetic genes and several potential regulatory genes. While  
668 the clustering of fructan biosynthetic genes may hint at the co-evolution of these gene  
669 families, a conserved gene co-expression suggesting an equal contribution to grain fructan  
670 biosynthesis was not observed. Instead the spatiotemporal dynamics for fructan biosynthetic  
671 genes point towards versatile roles of the different fructan types. Phylogenetic relationships  
672 between fructosyltransferases and invertases within *Poaceae* suggest that *6-SFT* may have  
673 evolved from a *Poaceae* ancestor genome after the major clade of vacuolar invertases  
674 diverged, followed then by *1-FFT* and *1-SST* (Huynh *et al.*, 2012). The analysis also showed  
675 the presence of a unique barley clade of four vacuolar invertase genes, among them the newly  
676 annotated *6G-FFT*, between the *6-SFT* and the *1-FFT* and *1-SST* clades, suggesting that extra  
677 duplication might have occurred in barley. Accordingly, in developing grain we observed  
678 similar co-expression with a set of TFs for *1-FFT*, *1-SST*, and *6-SFT*, which was different  
679 from the associations found for *6G-FFT*. The proposed dynamics of fructan biosynthesis in  
680 barley grain and potential regulators are presented in Figure 6. Assuming a specific  
681 spatiotemporal control of grain fructan biosynthesis, breeding or genetic engineering for high  
682 fructan content related to grain specific traits (e.g. nutritional quality or germination) will  
683 require careful approaches targeting certain tissues and developmental stages as recently  
684 suggested for engineering mixed linkage (1,3;1,4)- $\beta$ -glucan biosynthesis in the endosperm  
685 (Lim *et al.*, 2019).

686

687

688

689 **Supplementary data**

690 **Supplementary Table S1:** List of germplasms with their corresponding oligosaccharide  
691 profile group.

692 **Supplementary Table S2:** Oligosaccharide annotation information.

693 **Supplementary Table S3:** Oligosaccharide peak area entry means values.

694 **Supplementary Figure S1:** Representative chromatogram of mature barley grain soluble  
695 carbohydrates

696 **Supplementary Figure S2:** Metabolite distribution among the lines.

697 **Supplementary Figure S3:** Oligosaccharide profile prototypes as obtained by Neural Gas  
698 clustering.

699 **Supplementary Table S4:** Correlation and significance values for associations among the 27  
700 metabolites.

701 **Supplementary Figure S4:** Manhattan plots and box plots for all significant results from the  
702 ratio GWAS.

703 **Supplementary Table S5:** List of all detected gene models in the significant QTL interval.

704 **Supplementary Table S6:** Results from exome capture data evaluation.

705 **Supplementary Figure S5:** Box plots for significant effects of SNPs identified from exome  
706 capture data.

707 **Supplementary Table S7:** Heatmap of correlations for the expression of fructan genes with  
708 other gene models from the QTL interval for all developmental phases and tissues.

709 **Supplementary Table S8:** Expression data and Pearson correlation values for associations  
710 among the gene models from the GWA scan for all developmental phases and tissues.

711

712

713 **Conflict of Interest Statement**

714 All authors state no conflict of interest concerning this manuscript.

715

716

717

718 **Acknowledgements**

719 This work was supported by grants from the German Research Foundation (DFG, MA  
720 4814/3-1 & 3-2) to Andrea Matros and the Australian Research Council (ARC) Centre of  
721 Excellence in Plant Energy Biology (<http://www.plantenergy.uwa.edu.au/>) to Rachel Burton.  
722 Kelly Houston and Robbie Waugh acknowledge the support of the Rural & Environment  
723 Science & Analytical Services Division of the Scottish Government We greatly acknowledge  
724 the excellent technical assistance of Shi F. Khor, Jelle Lahnstein. We wish to thank Natalie S.  
725 Betts and Helen M. Collins for their help with the germinated grain dataset. The authors  
726 acknowledge the use of the facilities, and scientific and technical assistance of the Australian  
727 Plant Phenomics Facility, which is supported by the Australian Government's National  
728 Collaborative Research Infrastructure Strategy (NCRIS).

729

730

731 **Author Contributions**

732 AM and RAB designed and developed the concept of the study. RW provided the material  
733 and genomic data of the barley panel and was involved in the design of the GWAS. AM and  
734 BB conducted the growth experiments and harvested the mature grain material at TPA. AM  
735 performed the oligosaccharide profiling analysis and evaluated the HPAEC-PAD data. AM  
736 and KW conducted the experiments related to the identification of fructan structures  
737 (isolation and MS identification). US performed the clustering of the data and the distribution  
738 analysis. KH performed the GWAS and ratio-GWAS as well as the evaluation of the exome  
739 capture data. MRT, MKA and LGW conducted the transcriptomic analyses of pistil tissues  
740 and developing grain tissues. MS and RW conducted the transcriptomic analysis of  
741 developing anther tissues. AM evaluated the transcript expression datasets provided and  
742 conducted the co-expression analyses. AM, KH and RAB wrote and provided a draft  
743 manuscript which has been revised and accepted by all authors.

744

745



## References

**Andrade AC, Bautista CR, Cabrera MR, Guerra RS, Chávez EG, Ahumada CF, Lagunes AG.** 2019. *Agave salmiana* fructans as gut health promoters: Prebiotic activity and inflammatory response in Wistar healthy rats. *International Journal of Biological Macromolecules* 136, 785-795.

**Aubert MK, Coventry S, Shirley NJ, Betts NS, Würschum T, Burton RA, Tucker MR.** 2018. Differences in hydrolytic enzyme activity accompany natural variation in mature aleurone morphology in barley (*Hordeum vulgare* L.). *Scientific Reports* 8, 1-14, doi: 10.1038/s41598-018-29068.

**Bayer MM, Rapazote-Flores P, Ganal M, Hedley PE, Macaulay M, Plieske J, Ramsay L, Russell J, Shaw PD, Thomas W.** 2017. Development and evaluation of a barley 50k iSelect SNP array. *Frontiers in Plant Science* 8, 1792, doi: 10.3389/fpls.2017.01792.

**Barakate A, Orr J, Schreiber M, Colas I, Lewandowska D, McCallum N, Macaulay M, Morris J, Arrieta M, Hedley PE.** 2020. Time-resolved transcriptome of barley anthers and meiocytes reveals robust and largely stable gene expression changes at meiosis entry. *bioRxiv*, doi: 10.1101/2020.04.20.051425.

**Betts NS, Dockter C, Berkowitz O, Collins HM, Hooi M, Lu Q, Burton RA, Bulone V, Skadhauge B, Whelan J.** 2019. Transcriptional and biochemical analyses of gibberellin expression and content in germinated barley grain. *Journal of Experimental Botany*, doi: 10.1093/jxb/erz546.

**Bialeski RL.** 1993. Fructan hydrolysis drives petal expansion in the ephemeral daylily flower. *Plant Physiology* 103 (1), 213-219.

**Bonnett GD, Sims IM, Simpson RJ, Cairns AJ.** 1997. Structural diversity of fructan in relation to the taxonomy of the Poaceae. *New Phytologist* 136 (1), 11-17.



**Bradbury PJ, Zhang Z, Kroon DE, Casstevens TM, Ramdoss Y, Buckler ES.** 2007.

TASSEL: software for association mapping of complex traits in diverse samples.

Bioinformatics 23 (19), 2633-2635.

**Burton RA, Fincher GB.** 2009. (1, 3; 1, 4)- $\beta$ -d-Glucans in cell walls of the Poaceae, lower plants, and fungi: a tale of two linkages. *Molecular Plant* 2 (5), 873-882.

**Cairns AJ, Pollock CJ, Gallagher JA, Harrison J.** 2000. Fructans: synthesis and regulation. In: Leegood, RC, Sharkey, TD, Von Caemmerer S, eds, *Photosynthesis: physiology and metabolism*. Kluwer Academic Publishers, pp 301-320.

**Carpita NC, Housley TL, Hendrix JE.** 1991. New features of plant-fructan structure revealed by methylation analysis and C-13 NMR-spectroscopy. *Carbohydrate Research* 217, 127-136.

**Cerning J, Guilbot A.** 1973. Changes in the carbohydrate composition during development and maturation of the wheat and barley kernel. *Cereal Chem* 220-232.

**Cochrane MP.** 2000. Seed carbohydrates. In: Black M, Brewley JD, eds. *Seed technology and its biological basis*. USA, Boca Raton: CRC Press, pp 85-120.

**Colmsee C, Beier S, Himmelbach A, Schmutzer T, Stein N, Scholz U, Mascher M.** 2015. BARLEX—the barley draft genome explorer. *Molecular Plant* 8 (6), 964-966.

**Comadran J, Kilian B, Russell J, Ramsay L, Stein N, Ganai M, Shaw P, Bayer M, Thomas W, Marshall D.** 2012. Natural variation in a homolog of *Antirrhinum centroradialis* contributed to spring growth habit and environmental adaptation in cultivated barley. *Nature Genetics* 44 (12), 1388.

**Cozzolino D, Degner S, Eglinton J.** 2016. Relationships between fructans content and barley malt quality. *Food Analytical Methods* 9 (7), 2010-2015.

**Darrier B, Russell J, Milner SG, Hedley PE, Shaw PD, Macaulay M, Ramsay LD, Halpin C, Mascher M, Fleury DL.** 2019. A comparison of mainstream genotyping

platforms for the evaluation and use of barley genetic resources. *Frontiers in Plant Science* 10, 544, doi: 10.3389/fpls.2019.00544.

**De Arcangelis E, Messia MC, Marconi E.** 2019. Variation of polysaccharides profiles in developing kernels of different barley cultivars. *Journal of Cereal Science* 85, 273-278.

**Duchateau N, Bortlik K, Simmen U, Wiemken A, Bancal P.** 1995. Sucrose: fructan 6-fructosyltransferase, a key enzyme for diverting carbon from sucrose to fructan in barley leaves. *Plant Physiology* 107 (4), 1249-1255.

**Dwivedi S, Sahrawat K, Puppala N, Ortiz R.** 2014. Plant prebiotics and human health: biotechnology to breed prebiotic-rich nutritious food crops. *Electronic Journal of Biotechnology* 17 (5), 238-245.

**Eigner W-D, Abuja P, Beck RH, Praznik W.** 1988. Physicochemical characterization of inulin and sinistrin. *Carbohydrate Research* 180 (1), 87-95.

**Gieger C, Geistlinger L, Altmaier E, De Angelis MH, Kronenberg F, Meitinger T, Mewes H-W, Wichmann H-E, Weinberger KM, Adamski J.** 2008. Genetics meets metabolomics: a genome-wide association study of metabolite profiles in human serum. *PLoS Genetics* 4 (11), doi: 10.1371/journal.pgen.1000282.

**Haskå L, Nyman M, Andersson R.** 2008. Distribution and characterisation of fructan in wheat milling fractions. *Journal of Cereal Science* 48 (3), 768-774.

**Hendry GAF, Wallace RK.** 1993. The origin, distribution, and evolutionary significance of fructans. In: Suzuki M, Chatterton NJ, eds. *Science and technology of fructans*. USA, Boca Raton: CRC Press, pp 119-139.

**Henry RJ.** 1988. The carbohydrates of barley grains—A review. *Journal of the Institute of Brewing* 94 (2), 71-78.

**Henry R, Saini H.** 1989. Characterization of cereal sugars and oligosaccharides. *Cereal Chemistry* 66 (5), 362-365.

**Henson CA.** 2000. Enzymology of fructan polymerization and depolymerization in grasses. In: Gupta AK, Kaur N, eds. Carbohydrate Reserves in Plants - Synthesis and Regulation. The Netherlands, Amsterdam: Elsevier Science, pp 269-281.

**Housley T.** 2000. Role of fructans redistributed from vegetative tissues in grain filling of wheat and barley. In: Gupta AK, Kaur N, eds. Developments in Crop Science, Elsevier, pp 207-221.

**Huynh B-L, Palmer L, Mather DE, Wallwork H, Graham RD, Welch RM, Stangoulis JC.** 2008a. Genotypic variation in wheat grain fructan content revealed by a simplified HPLC method. Journal of Cereal Science 48 (2), 369-378.

**Huynh B-L, Wallwork H, Stangoulis JC, Graham RD, Willmore KL, Olson S, Mather DE.** 2008b. Quantitative trait loci for grain fructan concentration in wheat (*Triticum aestivum* L.). Theoretical and Applied Genetics 117 (5), 701-709.

**Huynh B-L, Mather D, Schreiber A, Toubia J, Baumann U, Shoaie Z, Stein N, Ariyadasa R, Stangoulis JR, Edwards J, et al.** 2012. Clusters of genes encoding fructan biosynthesizing enzymes in wheat and barley. Plant Molecular Biology 80 (3), 299-314.

**Illig T, Gieger C, Zhai G, Römisch-Margl W, Wang-Sattler R, Prehn C, Altmaier E, Kastenmüller G, Kato BS, Mewes H-W.** 2010. A genome-wide perspective of genetic variation in human metabolism. Nature genetics 42 (2), 137, doi: 10.1038/ng.507.

**Jenkins CL, Lewis D, Bushell R, Belobrajdic DP, Bird AR.** 2011. Chain length of cereal fructans isolated from wheat stem and barley grain modulates in vitro fermentation. Journal of Cereal Science 53 (2), 188-191.

**Jin Y, Fei M, Rosenquist S, Jin L, Gohil S, Sandström C, Olsson H, Persson C, Höglund A-S, Fransson G.** 2017. A dual-promoter gene orchestrates the sucrose-coordinated synthesis of starch and fructan in barley. Molecular plant 10 (12), 1556-1570.

**Julkowska MM, Saade S, Agarwal G, Gao G, Pailles Y, Morton MJ, Awlia M, Tester M.** 2019. MVApp-Multivariate analysis application for streamlined data analysis and curation. *Plant Physiology* 180 (3), 1261-1276.

**Kaspar-Schoenefeld S, Merx K, Jozefowicz AM, Hartmann A, Seiffert U, Weschke W, Matros A, Mock HP.** 2016. Label-free proteome profiling reveals developmental-dependent patterns in young barley grains. *Journal of Proteomics* 143, 106-121.

**Kooiker M, Drenth J, Glassop D, McIntyre CL, Xue G-P.** 2013. TaMYB13-1, a R2R3 MYB transcription factor, regulates the fructan synthetic pathway and contributes to enhanced fructan accumulation in bread wheat. *Journal of Experimental Botany* 64 (12), 3681-3696.

**Langridge P, Waugh R.** 2019. Harnessing the potential of germplasm collections. *Nature Genetics* 51, 200.

**Lim WL, Collins HM, Byrt CS, Lahnstein J, Shirley NJ, Aubert MK, Tucker MR, Peukert M, Matros A, Burton RA.** 2019. Overexpression of HvCslF6 in barley grain alters carbohydrate partitioning plus transfer tissue and endosperm development. *Journal of Experimental Botany* 71 (1), 138-153.

**Lipka AE, Tian F, Wang Q, Peiffer J, Li M, Bradbury PJ, Gore MA, Buckler ES, Zhang Z.** 2012. GAPIT: genome association and prediction integrated tool. *Bioinformatics* 28 (18), 2397-2399.

**Liu FT, Li P, Chen MX, Luo YM, Prabhakar M, Zheng HM, He Y, Qi Q, Long HY, Zhang Y, et al.** 2017. Fructooligosaccharide (FOS) and galactooligosaccharide (GOS) increase bifidobacterium but reduce butyrate producing bacteria with adverse glycemic metabolism in healthy young population. *Scientific Reports* 7 (1), 11789.

**Lu C, Koroleva OA, Farrar JF, Gallagher J, Pollock CJ, Tomos AD.** 2002. Rubisco small subunit, chlorophylla/b-binding protein and sucrose: fructan-6-fructosyl transferase gene expression and sugar status in single barley leaf cells *in situ*. Cell type specificity and induction by light. *Plant Physiology* 130 (3), 1335-1348.

**Lüscher M, Hochstrasser U, Boller T, Wiemken A.** 2000. Isolation of sucrose: sucrose 1-fructosyltransferase (1-SST) from barley (*Hordeum vulgare*). *The New Phytologist* 145 (2), 225-232.

**Martínez-Noël G, Tognetti J, Nagaraj V, Wiemken A, Pontis H.** 2006. Calcium is essential for fructan synthesis induction mediated by sucrose in wheat. *Planta* 225 (1), 183-191.

**Mascher M, Gundlach H, Himmelbach A, Beier S, Twardziok SO, Wicker T, Radchuk V, Dockter C, Hedley PE, Russell J.** 2017. A chromosome conformation capture ordered sequence of the barley genome. *Nature* 544, 427-433.

**Matros A, Peukert M, Lahnstein J, Seiffert U, Burton R.** 2019. Determination of fructans in plants: Current analytical means for extraction, detection, and quantification. *Annual Plant Reviews Online*, 1-39.

**Meints B, Cuesta-Marcos A, Fisk S, Ross A, Hayes P.** 2016. Food barley quality improvement and germplasm utilization. In *Exploration, identification and utilization of barley germplasm*. Elsevier, pp 41-73.

**Nagaraj VJ, Altenbach D, Galati V, Lüscher M, Meyer AD, Boller T, Wiemken A.** 2004. Distinct regulation of sucrose: sucrose-1-fructosyltransferase (*1-SST*) and sucrose: fructan-6-fructosyltransferase (*6-SFT*), the key enzymes of fructan synthesis in barley leaves: *1-SST* as the pacemaker. *New Phytologist* 161 (3), 735-748.

**Nemeth C, Andersson AA, Andersson R, Mangelsen E, Sun C, Åman P.** 2014. Relationship of grain fructan content to degree of polymerisation in different barleys. *Food and Nutrition Sciences* 5 (6), 581-589.

**Noël G, Tognetti JA, Pontis HG.** 2001. Protein kinase and phosphatase activities are involved in fructan synthesis initiation mediated by sugars. *Planta* 213 (4), 640-646.

**Nilsson U, Dahlqvist A, Nilsson B.** 1986. Cereal fructosans: part 2—Characterization and structure of wheat fructosans. *Food chemistry* 22 (2), 95-106.

**Patro R, Duggal G, Love MI, Irizarry RA, Kingsford C.** 2017. Salmon provides fast and bias-aware quantification of transcript expression. *Nature methods* 14 (4), 417.

**Petersen A-K, Krumsiek J, Wägele B, Theis FJ, Wichmann H-E, Gieger C, Suhre K.** 2012. On the hypothesis-free testing of metabolite ratios in genome-wide and metabolome-wide association studies. *BMC bioinformatics* 13 (1), 120, doi: 10.1186/1471-2105-13-120.

**Peukert M, Lim WL, Seiffert U, Matros A.** 2016. Mass spectrometry imaging of metabolites in barley grain tissues. *Current Protocols in Plant Biology* 1 (4), 574-591.

**Peukert M, Thiel J, Peshev D, Weschke W, Van den Ende W, Mock HP, Matros A.** 2014. Spatio-temporal dynamics of fructan metabolism in developing barley grains. *The Plant Cell* 26 (9), 3728-3744.

**Pollock CJ, Cairns AJ.** 1991. Fructan metabolism in grasses and cereals. *Annual Review of Plant Physiology and Plant Molecular Biology* 42 (1), 77-101.

**Pollock CJ, Cairns AJ, Sims IM, Housley TL.** 1996. Fructans as reserve carbohydrates in crop plants In: Zamski E, Shaffer AA, eds. *Photoassimilate distribution in plants and crops: Source-sink relationships*. USA, New York: Marcel Dekker. pp 97-114.

**Ponce JA, Macías ER, Soltero JA, Fernández VV, Zúñiga V, Escalona HB.** 2008. Physical-Chemical and non-linear rheological properties of aqueous solutions of agave fructans. *e-Gnosis* 6, 1-23.

**Ritsema T, Brodmann D, Diks SH, Bos CL, Nagaraj V, Pieterse CM, Boller T, Wiemken A, Peppelenbosch MP.** 2009. Are small GTPases signal hubs in sugar-mediated induction of fructan biosynthesis? *PLoS One* 4. e6605

**Rocklin RD, Pohl CA.** 1983. Determination of carbohydrates by anion exchange chromatography with pulsed amperometric detection. *Journal of Liquid Chromatography* 6 (9), 1577-1590.

**Saunders R.** 1971. Fructosylraffinose, a tetrasaccharide in wheat bran. *Phytochemistry* 10 (2), 491-493.

**Schnyder H, Gillenberg C, Hinz J.** 1993. Fructan contents and dry matter deposition in different tissues of the wheat grain during development. *Plant, Cell & Environment* 16 (2), 179-187.

**Smith D, Morgan A, Aastrup S.** 1980. Variation in the biochemical composition of acid extracts from barleys of contrasting malting quality. *Journal of the Institute of Brewing* 86 (6), 277-283.

**Solhaug KA, Aares E.** 1994. Remobilization of fructans in *Phippsia algida* during rapid inflorescence development. *Physiologia Plantarum* 91 (2), 219-225.

**Suhre K, Shin S-Y, Petersen A-K, Mohny RP, Meredith D, Wägele B, Altmaier E, Deloukas P, Erdmann J, Grundberg E.** 2011. Human metabolic individuality in biomedical and pharmaceutical research. *Nature* 477, 54-60, doi: 10.1038/nature10354.

**Valluru R.** 2015. Fructan and hormone connections. *Frontiers in Plant Science* 6, 180, doi: 10.3389/fpls.2015.00180.

**Van den Ende W.** 2013. Multifunctional fructans and raffinose family oligosaccharides. *Frontiers in Plant Science* 4, 247, doi: 10.3389/fpls.2013.00247.

**Veenstra LD, Jannink J-L, Sorrells ME.** 2017. Wheat fructans: A potential breeding target for nutritionally improved, climate-resilient varieties. *Crop Science* 57 (3), 1624-1640.

**Veenstra LD, Santantonio N, Jannink J-L, Sorrells ME.** 2019. Influence of genotype and environment on wheat grain fructan content. *Crop Science* 59 (1), 190-198.

**Vergauwen R, Van den Ende W, Van Laere A.** 2000. The role of fructan in flowering of *Campanula rapunculoides*. *Journal of Experimental Botany* 51 (348), 1261-1266.

**Verspreet J, Dornez E, Delcour JA, Harrison SJ, Courtin CM.** 2015a. Purification of wheat grain fructans from wheat bran. *Journal of Cereal Science* 65, 57-59.

**Verspreet J, Dornez E, Van den Ende W, Delcour JA, Courtin CM.** 2015b. Cereal grain fructans: structure, variability and potential health effects. *Trends Food Science & Technology* 43 (1), 32-42.

**Verspreet J, Hansen AH, Dornez E, Delcour JA, Van den Ende W, Harrison SJ, Courtin CM.** 2015c. LC-MS analysis reveals the presence of graminan- and neo-type fructans in wheat grains. *Journal of Cereal Science* 61, 133-138.

**Verspreet J, Hansen AH, Harrison SJ, Vergauwen R, Van den Ende W, Courtin CM.** 2017. Building a fructan LC–MS2 library and its application to reveal the fine structure of cereal grain fructans. *Carbohydrate Polymers* 174, 343-351.

**Verspreet J, Pollet A, Cuyvers S, Vergauwen R, Van den Ende W, Delcour JA, Courtin CM.** 2012. A simple and accurate method for determining wheat grain fructan content and average degree of polymerization. *Journal of Agricultural and Food Chemistry* 60 (9), 2102-2107.

**Vijn I, Smeekens S.** 1999. Fructan: more than a reserve carbohydrate?. *Plant Physiology* 120 (2), 351-360.

**Wagner W, Keller F, Wiemken A.** 1983. Fructan metabolism in cereals: induction in leaves and compartmentation in protoplasts and vacuoles. *Zeitschrift für Pflanzenphysiologie* 112 (4), 359-372.

**Wei H, Bausewein A, Greiner S, Dauchot N, Harms K, Rausch T.** 2017a. *Ci MYB 17*, a stress-induced chicory R2R3-MYB transcription factor, activates promoters of genes involved in fructan synthesis and degradation. *New Phytologist* 215 (1), 281-298.



**Wei H, Zhao H, Su T, Bausewein A, Greiner S, Harms K, Rausch T.** 2017b. Chicory R2R3-MYB transcription factors *CiMYB5* and *CiMYB3* regulate fructan 1-exohydrolase expression in response to abiotic stress and hormonal cues. *Journal of Experimental Botany* 68 (15), 4323-4338.

**White LM, Secor GE.** 1953. Chromatographic evidence for the occurrence of a fructosyl raffinose in wheat flour and wheat. *Archives of Biochemistry and Biophysics* 44 (1), 244-245.

**Wilkinson LG, Yang X, Burton R, Würschum T, Tucker MR.** 2019. Natural variation in ovule morphology is influenced by multiple tissues and impacts downstream grain development in barley (*Hordeum vulgare* L). *Frontiers in Plant Science* 10, 1374, doi: 10.3389/fpls.2019.01374.

**Wolff D, Czaplak S, Heyer A, Radosta S, Mischnick P, Springer J.** 2000. Globular shape of high molar mass inulin revealed by static light scattering and viscometry. *Polymer* 41 (22), 8009-8016.

**Xue GP, Kooiker M, Drenth J, McIntyre CL.** 2011. TaMYB13 is a transcriptional activator of fructosyltransferase genes involved in  $\beta$ -2, 6-linked fructan synthesis in wheat. *The Plant Journal* 68 (5), 857-870.

**Yamamori A, Okada H, Kawazoe N, Ueno K, Onodera S, Shiomi N.** 2015. Structure of fructan prepared from onion bulbs (*Allium cepa* L.). *Journal of Applied Glycoscience* 62 (3), 95-99.

**Zhang Z, Ersoz E, Lai C-Q, Todhunter RJ, Tiwari HK, Gore MA, Bradbury PJ, Yu J, Arnett DK, Ordovas JM.** 2010. Mixed linear model approach adapted for genome-wide association studies. *Nature Genetics* 42 (4), 355-360.

## Tables

**Table 1:** List of the 27 annotated metabolites. Peaks were annotated by comparison with analytical standards and isolated fractions from barley grain and onion bulb samples as well as based on fructanase digestion and mild acid hydrolysis. Further details of compound annotation are provided in Table S2. Abbreviations: DP, degree of polymerisation; KP, kestopentaose; KT, kestotetraose; NS, neoseries-type fructan; RT, retention time

| Peak # | Compound                              | RT [min] | DP | Molecular family                  | Fructan-type        |
|--------|---------------------------------------|----------|----|-----------------------------------|---------------------|
| 1      | Glucose                               | 3.43     | 1  | Monosaccharide                    |                     |
| 2      | Fructose                              | 3.80     | 1  | Monosaccharide                    |                     |
| 3      | Melibiose                             | 4.36     | 2  | Disaccharide                      |                     |
| 4      | Sucrose                               | 5.95     | 2  | Disaccharide                      |                     |
| 5      | Raffinose                             | 9.20     | 3  | Raffinose family oligosaccharides |                     |
| 6      | 1-Kestose / 6-Kestose                 | 9.74     | 3  | Fructan                           | Inulin/Levan        |
| 7      | Maltose                               | 10.47    | 2  | Maltose-type oligosaccharides     |                     |
| 8      | Fructosylraffinose                    | 10.73    | 4  | Raffinose family oligosaccharides |                     |
| 9      | B-Type Procyanidin 1                  | 11.53    | 2  | Flavonoids                        |                     |
| 10     | 6G-Kestose                            | 12.13    | 3  | Fructan                           | NS-Inulin           |
| 11     | Nystose                               | 12.76    | 4  | Fructan                           | Inulin              |
| 12     | B-Type Procyanidin 2                  | 13.08    | 2  | Flavonoids                        |                     |
| 13     | 1&6-KT (Bifurcose) / 6G&1-KT (NS-DP4) | 13.52    | 4  | Fructan                           | Graminan, NS-Inulin |
| 14     | Maltotriose                           | 14.11    | 3  | Maltose-type oligosaccharides     |                     |
| 15     | UK-Fructan1                           | 14.68    | -  | Fructan                           | unknown             |
| 16     | 1,1,1-Kestopentaose                   | 15.68    | 5  | Fructan                           | Inulin              |
| 17     | 6G,1-KP (NS-DP5)                      | 16.38    | 5  | Fructan                           | NS-Inulin           |
| 18     | 6G&1-KP (NS-DP5)                      | 16.61    | 5  | Fructan                           | NS-Inulin           |
| 19     | Maltotetraose                         | 17.51    | 4  | Maltose-type oligosaccharides     |                     |
| 20     | Inulin-DP6                            | 18.47    | 6  | Fructan                           | Inulin              |
| 21     | Neoseries-DP6                         | 19.28    | 6  | Fructan                           | NS-Inulin           |
| 22     | Inulin-DP7                            | 21.10    | 7  | Fructan                           | Inulin              |
| 23     | Neoseries-DP7                         | 22.73    | 7  | Fructan                           | NS-Inulin           |
| 24     | Inulin-DP8                            | 23.48    | 8  | Fructan                           | Inulin              |
| 25     | Neoseries-DP8                         | 25.15    | 8  | Fructan                           | NS-Inulin           |
| 26     | Inulin-DP9                            | 25.94    | 9  | Fructan                           | Inulin              |
| 27     | Inulin-DP10                           | 28.10    | 10 | Fructan                           | Inulin              |

**Table 2:** Significant GWA results for the two metabolites neoserics-DP7 and inulin-DP9. Abbreviations: bp, base pair; DP, degree of polymerisation; LOD, logarithm of odds; MAF, minimum allele frequency; QTL, quantitative trait loci

**A: Information on the detected significant QTL**

| Trait         | Chromosome | Peak marker           | Peak marker bp | MAF  | LOD  | QTL start and end bp |
|---------------|------------|-----------------------|----------------|------|------|----------------------|
| Neoserics-DP7 | 7H         | JHI-Hv50k-2016-438638 | 3407292        | 0.14 | 8.65 | 174327..4056691      |
| Inulin-DP9    |            |                       |                |      | 6.74 |                      |

**B: Candidate gene models related to fructan biosynthesis**

| Gene model          | HORVU7Hr1G000250.3                                 | HORVU7Hr1G000260.2                                 | HORVU7Hr1G000270.1                                 | HORVU7Hr1G001040.6                                 | HORVU7Hr1G001070.17                                |
|---------------------|----------------------------------------------------|----------------------------------------------------|----------------------------------------------------|----------------------------------------------------|----------------------------------------------------|
| Gene model location | 261065..262018                                     | 276441..280334                                     | 318543..322514                                     | 2257431..2260153                                   | 2423328..2427280                                   |
| Description         | Acid beta-fructofuranosidase, GH family 32 protein | Acid beta-fructofuranosidase, GH family 32 protein | Acid beta-fructofuranosidase, GH family 32 protein | Acid beta-fructofuranosidase, GH family 32 protein | Acid beta-fructofuranosidase, GH family 32 protein |
| PFAM                | PF00251, PF08244, PF11837                          | PF00251, PF08244, PF11837                          | PF00251, PF08244                                   | PF00251, PF08244                                   | PF00251, PF08244                                   |
| UniprotKB           | A0A287VBC4                                         | M0XA31                                             | J7GIU6                                             | M0YBF9                                             | A0A287VC78                                         |
| Similar proteins    | J7GHS0                                             | B6ECP1                                             | M8C9V9                                             | Q9AUH3                                             | Q6PVN1                                             |
| Similarity          | 0.9                                                | 1                                                  | 0.9                                                | 1                                                  | 0.9                                                |
| Description         | Fructan:fructan 1-fructosyltransferase             | Sucrose:sucrose 1-fructosyltransferase             | 6(G)-fructosyltransferase                          | Sucrose:fructan 6-fructosyltransferase             | Vacuolar invertase1                                |
| Species             | <i>Hordeum vulgare</i>                             | <i>Hordeum vulgare</i>                             | <i>Aegilops tauschii</i>                           | <i>Hordeum vulgare</i>                             | <i>Triticum monococcum</i>                         |
| Abbreviation        | 1-FFT                                              | 1-SST                                              | 6G-FFT                                             | 6-SFT                                              | VI-1                                               |

**Table 3:** Significant GWA results for the ratios of neoseries-DP7 and inulin-DP9 with all other metabolites. Abbreviations: bp, base pair; DP, degree of polymerisation; FDR, false discovery rate; LOD, logarithm of odds; MAF, minimum allele frequency; *P*, probability value; *P*-gain, ratio of the lowest p-value of the two individual metabolites and the p-value of the metabolite ratio; P-values and FDR adjusted p-values from the initial GWAS for traits that did not identify significant associations but when included as a ratio do identify significant associations are included in columns '*P* for non sig trait' and 'FDR adjusted p-value for non sig trait'; \* indicates significant results passing the p-gain threshold of  $5.2 \times 10^2$ , which are also highlighted in light grey. Corresponding Manhattan and box plots are shown in Supplementary Figure S4.

| Ratio combination                 | Peak marker                                    | Peak marker bp      | MAF  | LOD  | <i>P</i> | <i>P</i> for non sig trait | FDR adjusted p-value | FDR adjusted p-value for non sig trait | <i>P</i> -gain | FDR adjusted p-gain |
|-----------------------------------|------------------------------------------------|---------------------|------|------|----------|----------------------------|----------------------|----------------------------------------|----------------|---------------------|
| Neoseries-DP7:Fructosylraffinose  | JHI-Hv50k-2016-438638<br>JHI-Hv50k-2016-438980 | 3407292<br>3689408  | 0.14 | 7.0  | 1.08E-07 | 6.26E-04                   | 2.24E-03             | 6.76E-01                               | 2.08E-02       | 2.08E-02            |
| Neoseries-DP7:B-Type Procyanidin1 |                                                |                     |      | 6.9  | 1.39E-07 | 4.73E-05                   | 2.87E-03             | 1.00E+00                               | 1.62E-02       | 1.62E-02            |
| Neoseries-DP7:1,1,1-Kestopentaose |                                                |                     |      | 9.1  | 8.62E-10 | 8.22E-05                   | 1.79E-05             | 2.84E-01                               | 2.61E+00       | 2.61E+00            |
| Neoseries-DP7:6G,1-KP             |                                                |                     |      | 9.0  | 8.96E-10 | 9.06E-01                   | 1.86E-05             | 1.00E+00                               | 2.51E+00       | 2.51E+00            |
| Neoseries-DP7:Inulin-DP6          |                                                |                     |      | 8.4  | 3.88E-09 | 9.78E-04                   | 8.04E-05             | 1.00E+00                               | 5.80E-01       | 5.80E-01            |
| Neoseries-DP7:Neoseries-DP6       |                                                |                     |      | 7.9  | 1.28E-08 | 1.51E-01                   | 2.66E-04             | 1.00E+00                               | 1.75E-01       | 1.75E-01            |
| Neoseries-DP7:Inulin-DP7          |                                                |                     |      | 9.1  | 8.45E-10 | 3.17E-03                   | 1.75E-05             | 1.00E+00                               | 2.66E+00       | 2.66E+00            |
| Neoseries-DP7:Neoseries-DP8       |                                                |                     |      | 10.8 | 1.64E-11 | 7.89E-02                   | 2.14E-07             | 1.00E+00                               | 1.37E+02       | 2.17E+02            |
| Neoseries-DP7:Inulin-DP10         | SCRI RS 8079                                   | 2325562             | 0.11 | 7.4  | 4.24E-08 | 3.46E-01                   | 1.72E-03             | 1.00E+00                               | 1.97E+05*      | 5.80E+02            |
| Inulin-DP9:1-Kestose              | JHI-Hv50k-2016-438638<br>JHI-Hv50k-2016-438980 | 3407292<br>3689408  | 0.14 | 8.0  | 1.03E-08 | 1.72E-02                   | 2.14E-04             | 1.00E+00                               | 1.75E+01       | 1.75E+01            |
| Inulin-DP9:1,1,1-Kestopentaose    |                                                |                     |      | 9.4  | 4.38E-10 | 8.22E-05                   | 9.08E-06             | 2.84E-01                               | 4.14E+02       | 4.14E+02            |
| Inulin-DP9:6G,1-KP                |                                                |                     |      | 7.3  | 6.29E-06 | 9.06E-01                   | 9.40E-04             | 1.00E+00                               | 2.88E-02       | 4.00E+00            |
| Inulin-DP9:Inulin-DP6             |                                                |                     |      | 8.4  | 4.03E-09 | 9.78E-04                   | 8.35E-05             | 1.00E+00                               | 4.50E+01       | 4.50E+01            |
| Inulin-DP9:Neoseries-DP6          |                                                |                     |      | 8.0  | 1.04E-08 | 1.51E-01                   | 2.15E-04             | 1.00E+00                               | 1.75E+01       | 1.75E+01            |
| Inulin-DP9:Inulin-DP7             |                                                |                     |      | 9.0  | 9.04E-10 | 3.17E-03                   | 1.87E-05             | 1.00E+00                               | 2.01E+02       | 2.01E+02            |
| Inulin-DP9:Neoseries-DP8          | JHI-Hv50k-2016-435510<br>JHI-Hv50k-2016-437376 | 280043<br>2350955   | 0.07 | 10.7 | 1.93E-11 | 3.71E-04                   | 4.01E-07             | 1.00E+00                               | 4.08E+09*      | 2.02E+06            |
|                                   | JHI-Hv50k-2016-438638<br>JHI-Hv50k-2016-438980 | 3407292<br>3689408  | 0.14 | 10.3 | 4.89E-11 | 7.89E-02                   | 5.06E-07             | 1.00E+00                               | 3.71E+03*      | 7.42E+03            |
| Inulin-DP9:Inulin-DP10            | JHI-Hv50k-2016-435510<br>JHI-Hv50k-2016-437376 | 280043<br>2350955   | 0.07 | 6.9  | 1.36E-07 | 3.21E-01                   | 1.93E-03             | 1.00E+00                               | 1.93E+04*      | 4.18E+02            |
|                                   | SCRI RS 8079                                   | 2325562             | 0.11 | 6.9  | 1.40E-07 | 3.46E-01                   | 1.93E-03             | 1.00E+00                               | 6.43E+05*      | 5.17E+02            |
| Neoseries-DP7:Inulin-DP9          | JHI-Hv50k-2016-438638<br>JHI-Hv50k-2016-438980 | 3407292,<br>3689408 | 0.14 | 1.6  | 2.31E-02 | 1.80E-07                   | 1.00E+00             | 3.74E-03                               | 9.75E-08       | 4.66E-05            |

**Table 4:** Significant correlations for the expression of fructan metabolism genes with each other and with potential regulatory gene models from the detected QTL interval for developing barley grain. Positive correlations are shown in blue and negative ones in orange, whereas the color code is indicative for the strength of the correlation (the darker, the stronger). Significance threshold was  $p > 0.05$ . Numbered boxes without formatting indicate values just above significance ( $p < 0.055$ ). Bold framed boxes indicate correlations which were detected in various developing grain datasets. Datasets correspond to the ones presented in Figure 5 and methods are detailed in section ‘material and methods’. The raw data are presented in Table S8.

| Gene Name                  | Annotation                                                | Molecular Function             | 1-FFT | 1-SST | 6G-FFT | 6-SFT | VI   | 1-FEH | 6-FEH |
|----------------------------|-----------------------------------------------------------|--------------------------------|-------|-------|--------|-------|------|-------|-------|
| <b>HORVU2Hr1G109120.2</b>  | <b>Fructan 6-exohydrolase (6-FEH)</b>                     | <b>Carbohydrate metabolism</b> |       |       | 0.81   |       |      | 0.62  |       |
| <b>HORVU6Hr1g011260.19</b> | <b>Fructan 1-exohydrolase (1-FEH)</b>                     | <b>Carbohydrate metabolism</b> |       |       |        |       |      |       | 0.62  |
| <b>HORVU7Hr1G000250.3</b>  | <b>Fructan-fructan 1-fructosyltransferase (1-FFT)</b>     | <b>Carbohydrate metabolism</b> |       | 0.92  | -0.97  | 0.88  |      |       |       |
| <b>HORVU7Hr1G000260.2</b>  | <b>Sucrose:sucrose 1-fructosyltransferase (1-SST)</b>     | <b>Carbohydrate metabolism</b> | 0.92  |       | -0.84  | 0.99  |      |       |       |
| <b>HORVU7Hr1G000270.1</b>  | <b>6(G)-fructosyltransferase (6G-FFT)</b>                 | <b>Carbohydrate metabolism</b> | -0.97 | -0.84 |        | -0.80 |      |       | 0.81  |
| HORVU7Hr1G000820.1         | WD_REPEATS_REGION domain-containing protein               | Transcription factor           | 0.95  | 0.99  | -0.87  | 0.98  |      |       |       |
| HORVU7Hr1G000910.1         | NAC domain-containing protein                             | Transcription factor           |       |       |        |       |      | 0.81  |       |
| <b>HORVU7Hr1G001040.6</b>  | <b>Sucrose:fructan 6-fructosyltransferase (6-SFT)</b>     | <b>Carbohydrate metabolism</b> | 0.73  | 0.98  |        |       |      |       |       |
| HORVU7Hr1G001050.1         | AP2/ERF domain-containing protein                         | Transcription factor           |       |       |        |       |      | -0.83 |       |
| <b>HORVU7Hr1G001070.17</b> | <b>Vacuolar invertase1 (VI-1)</b>                         | <b>Carbohydrate metabolism</b> |       |       |        |       |      |       |       |
| HORVU7Hr1G001120.1         | Protein ALWAYS EARLY 3                                    | Transcription factor           | 0.80  | 0.92  |        | 0.95  | 0.78 |       |       |
| HORVU7Hr1G001300.3         | GRAS domain-containing protein (Scarecrow-like protein 6) | Transcription factor           | 0.68  | 0.84  |        | 0.88  |      |       |       |
| HORVU7Hr1G001310.1         | Scarecrow-like protein 22                                 | Transcription factor           | 0.99  | 0.96  | -0.95  | 0.94  | 0.80 |       |       |
| HORVU7Hr1G001320.1         | GRAS domain-containing protein                            | Transcription factor           |       |       |        | 0.80  |      |       |       |
| HORVU7Hr1G001830.3         | HTH myb-type domain-containing protein                    | Transcription factor           | 0.88  |       | -0.91  |       |      | 0.68  | 0.88  |

## Figure legends

**Figure 1:** Oligosaccharide profile groups as obtained by Neural Gas clustering. Shown are the mean profiles of the two major profile groups. Value (y-axis) represents the peak area [nC\*min] of the individual compounds (x-axis) listed in Table 1. Profile group 2 was characterised by higher levels of sugar monomers and sucrose, lower fructosylraffinose and higher overall fructan values. Abbreviations: G-glucose, F-fructose, Me-melibiose, S-sucrose, R-raffinose, 1-K/6-K-1-kestose/6-kestose, M-maltose, FR-fructosylraffinose, P1-procyanidin B1, 6G-K-6G-kestose, N-Nystose, P2-procyanidin B2, B-1&6-KT (Bifurcose)/6G&1-KT (NS-DP4), Mtr-maltotriose, UK-unknown fructan, I-DP5-inulin DP5, NS-DP5-neoseries-DP5 (probably 6G,1-KP and 6G&1-KP), Mte-maltotetraose, I-DP6-inulin DP6, NS-DP6-neoseries-DP6, I-DP7-inulin DP7, NS-DP7-neoseries-DP7, I-DP8-inulin DP8, NS-DP8-neoseries-DP8, I-DP9-inulin DP9, I-DP10-inulin DP10.

**Figure 2:** Correlation pattern among metabolites. Pair-wise Pearson correlations are shown in a heat map representation, whereas metabolites are sorted according to correlation-based hierarchical cluster analysis. High positive correlations are represented by dark blue and negative ones by red circles, whereas the circle diameter is indicative for the strength of the correlation. X-not significantly correlated ( $p>0.05$ ). The raw data are presented in Table S4.

**Figure 3:** Results of the GWA scan. (A) Manhattan plots are shown for the two fructans neoseries-DP7 and inulin-DP9. The  $-\log_{10}$  (p-value) is shown on the y-axis and the 7 barley chromosomes are shown on the x-axis. Marker-trait association analysis was based on mean integrated peak areas. Integrated box plots show information for the top SNP (JHI-Hv50k-2016-438638). The variable alleles found (A and G) are shown on the x-axis. The y-axis shows the median of the metabolite amount for all lines with the respective allele variant; the width of the box is indicative for the number of lines with this particular allele. The false discovery rate significance threshold =  $-\log_{10}(p) 6.02$ . (B) Assembling of the annotated gene models from the significant QTL region according to functional categories as obtained from the UniProt database (<https://www.uniprot.org/uniprot/>, June 2019). Numbers represent the count of gene models with the respective functional annotation.

**Figure 4:** Location of non-synonymous SNPs in fructan biosynthesis candidate genes. All significant causal SNPs (position assigned in bold red) are located within functional protein coding regions of the genes (black regions of the transcripts). All identified SNPs are

presented in Table S6 and box plots for significant effects are shown in Figure S5. For *6-SFT* no SNP was identified.

**Figure 5:** Transcript expression of the fructan biosynthesis genes in barley across plant development and in various tissues. Datasets included in the analysis are detailed in the materials and methods section. Genes included comprise the five fructan biosynthesis genes from the detected significant QTL region (*1-FFT*, HORVU7Hr1G000250; *1-SST*, HORVU7Hr1G000260; *6G-FFT*, HORVU7Hr1G000270; *6-SFT*, HORVU7Hr1G001040; and *VI-1*, HORVU7Hr1G001070) as well as three known fructan hydrolyase encoding genes (*6-FEH*, HORVU2Hr1G109120; *6-FEH/CWI2*, HORVU2Hr1G118820; and *1-FEH*, HORVU6Hr1g011260). Expression levels are colour coded, whereas different scales were used for TPM and FPKM values as indicated in the legend. (A) shows expression levels in the early vegetative phase for whole germinated grain tissues and for isolated germinated grain tissues from 0 to 96 hours after imbibition (HAI). Also, expression levels in seedling are shown for germinated embryo (GE), root and shoot. (B) shows data from the reproductive phase. Vegetative tissues included are: EPI, epidermal strips (4 weeks after planting, W4); ROO2, roots (W4); RAC, inflorescences, rachis (W5); LEM, inflorescences, lemma (W6); LOD, inflorescences, lodicule (W6); PAL, dissected inflorescences, palea (W6); INF2, inflorescence (10 mm); and NOD, internode. Meiosis stages included are: A.Pre, premeiosis anthers; A.LepZyg, leptotene/zygotene anthers; M.Lep/Zyg leptotene/zygotene meiocytes; A.MetTet, metaphaseI-tetrad anthers; A.PacDip, pachytene/diplotene anthers; M.PacDip, pachytene/diplotene meiocytes. Waddington (W) stages for pistil development are: W8; W8.5; W9; W9.5; and W10. Isolated pistil tissues are: nucellus (including nucellus and embryo sac for W8.5); integument; ovary wall; ES, embryo sac; EC+CC, egg apparatus and central cell; ANT, antipodal cells; and chalaza. (C) shows data from the grain development phase for whole developing grain (from 7 to 20 days after pollination, DAP) and for isolated developing grain tissues from 7 to 25 DAP. Abbreviations are SA, sub-aleurone/outer starchy endosperm; and SE, starchy endosperm/inner starchy endosperm. Also, data from senescing leaf (SN) are presented. Other abbreviations are: At, anthesis; CI, collar initiation; Em, emergence; Hv, harvest; and Sw, sowing.

**Figure 6:** Fructan-types, suggested biosynthesis routes and potential regulators in developing barley grain. Specific spatiotemporal biosynthesis of oligofructans was observed for barley

grains. Continuous bold arrows illustrate the major route of biosynthesis during the pre-storage phase (until 14 DAP) and the dashed bold arrows indicate the major route during the storage phase (until 20 DAP). During the pre-storage phase high transcript levels for *I-SST* and *6-SFT* were observed for the endosperm leading to an accumulation of 6-kestose and bifurcose. With transition to the storage phase a transcriptional switch was observed resulting in high transcript levels of *I-SST* in the nucellar projection (NP). *I-FFT* was found to be exclusively expressed in the NP during the storage phase. Induction of the inulin-type fructan biosynthesis pathway led to high amounts of 1-kestose and nystose accumulating in the endosperm cavity (Peukert et al., 2014). The dotted bold arrow illustrates the major route of biosynthesis during the late storage phase with *6G-FFT* transcripts detected in the outer endosperm (from 30 DAP onwards, Figure 5), which matched the detection of neoseriate-type oligofructans in mature barley grains (Figure 1). Transcription factors (TF) showing significant correlation of transcript expression pattern in developing grain with *I-FFT*, *I-SST* and *6-SFT* (positive), *6G-FFT* (negative), and *VI-1* (positive) are listed in the inserted text box. Inulin-neoseriate represents linear fructans with  $\beta(2,1)$  &  $\beta(2,6)$  linked fructosyl units at the glucose (1F, 6G-di- $\beta$ -D-fructofuranosylsucrose is shown; m=1, n= 1), graminan-type represents branched fructans with  $\beta(2,1)$  &  $\beta(2,6)$  linked fructosyl units (bifurcose is shown; m= 1, n= 1), inulin-type illustrates linear fructans with  $\beta(2,1)$  linked fructosyl units (1-kestose is shown; n= 1); , and levan-type shows linear fructans with  $\beta(2,6)$  linked fructosyl units (6-kestose is shown; n= 1). The arrows indicate direction of further polymerisation. Abbreviations are: *I-FFT*, fructan:fructan 1-fructosyltransferase; *I-SST*, sucrose:sucrose 1-fructosyl-transferase; *6-SFT*, sucrose:fructan 6-fructosyltransferase; *6G-FFT*, fructan:fructan 6G-fructosyltransferase; *VI-1*, vacuolar invertase 1 (unknown role in developing grain).



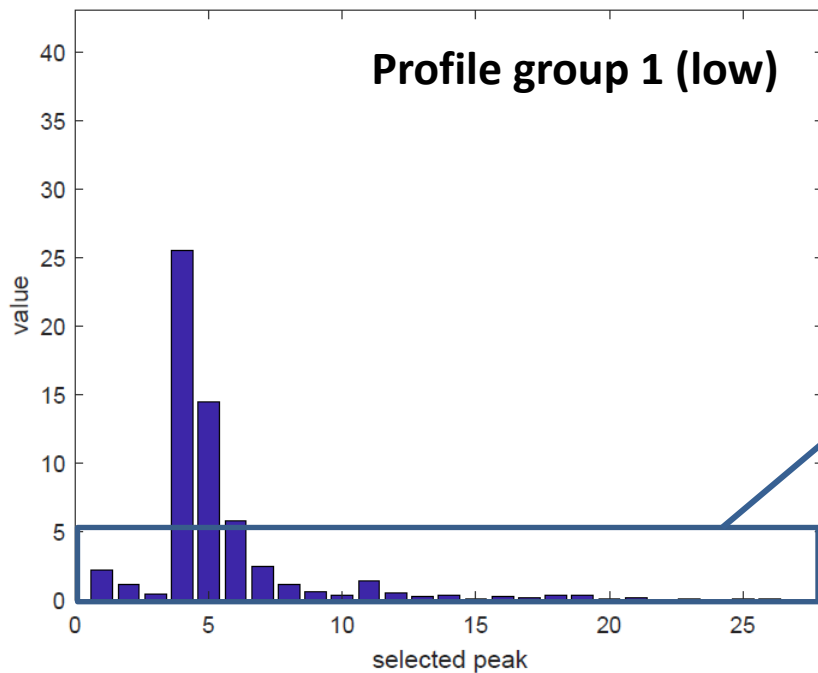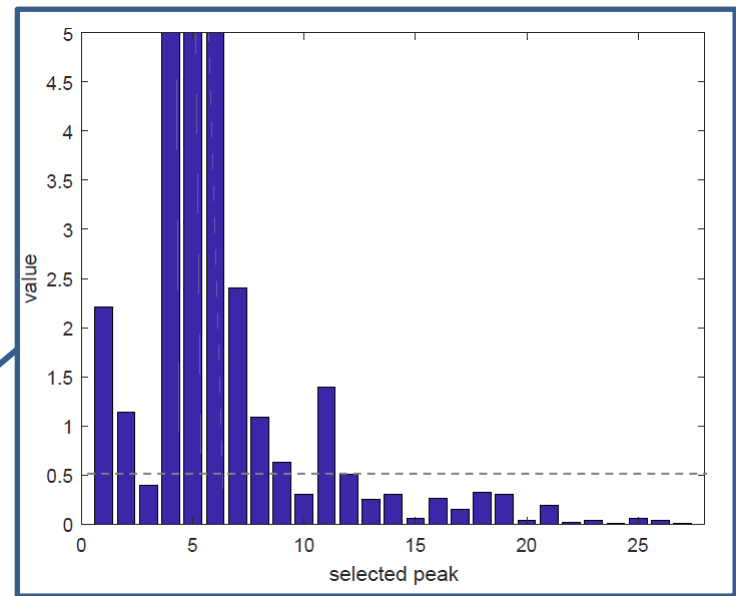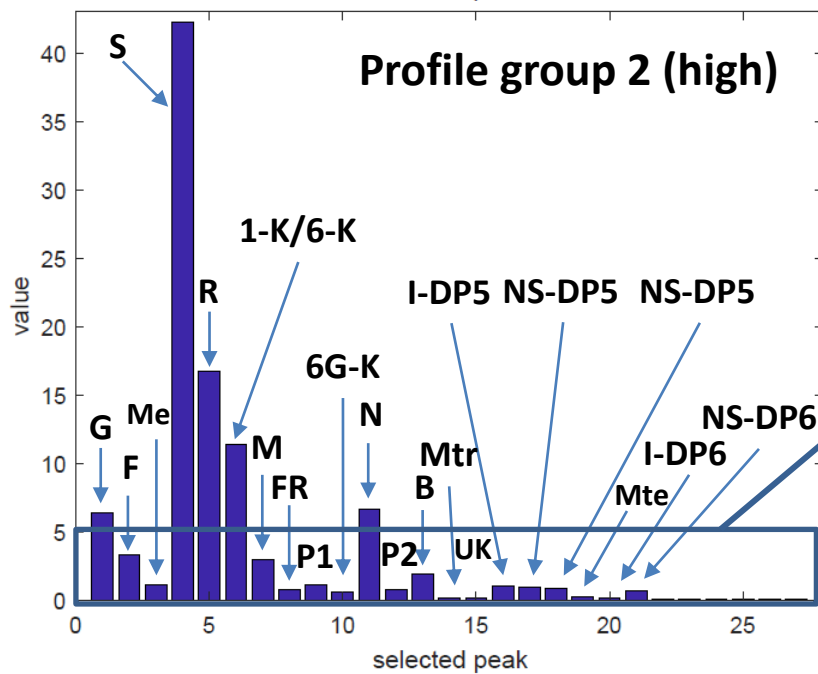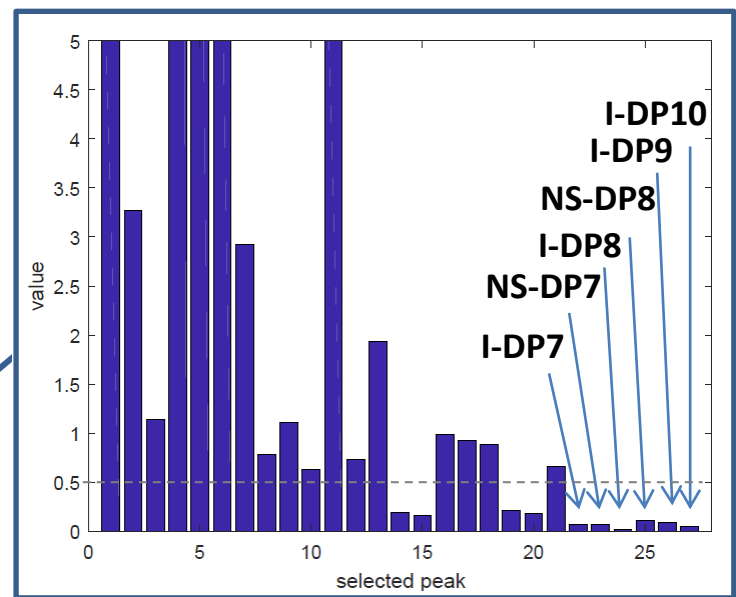

**Figure 1:** Oligosaccharide profile groups as obtained by Neural Gas clustering. Shown are the mean profiles of the two major profile groups. Value (y-axis) represents the peak area [nC\*min] of the individual compounds (x-axis) listed in Table 1. Profile group 2 was characterised by higher levels of sugar monomers and sucrose, lower fructosylraffinose and higher overall fructan values. Abbreviations: G-glucose, F-fructose, Me-melibiose, S-sucrose, R-raffinose, 1-K/6-K-1-kestose/6-kestose, M-maltose, FR-fructosylraffinose, P1-procyanidin B1, 6G-K-6G-kestose, N-Nystose, P2-procyanidin B2, B-1&6-KT (Bifurcose)/6G&1-KT (NS-DP4), Mtr-maltotriose, UK-unknown fructan, I-DP5-inulin DP5, NS-DP5-neoseries-DP5 (probably 6G,1-KP and 6G&1-KP), Mte-maltotetraose, I-DP6-inulin DP6, NS-DP6-neoseries-DP6, I-DP7-inulin DP7, NS-DP7-neoseries-DP7, I-DP8-inulin DP8, NS-DP8-neoseries-DP8, I-DP9-inulin DP9, I-DP10-inulin DP10.

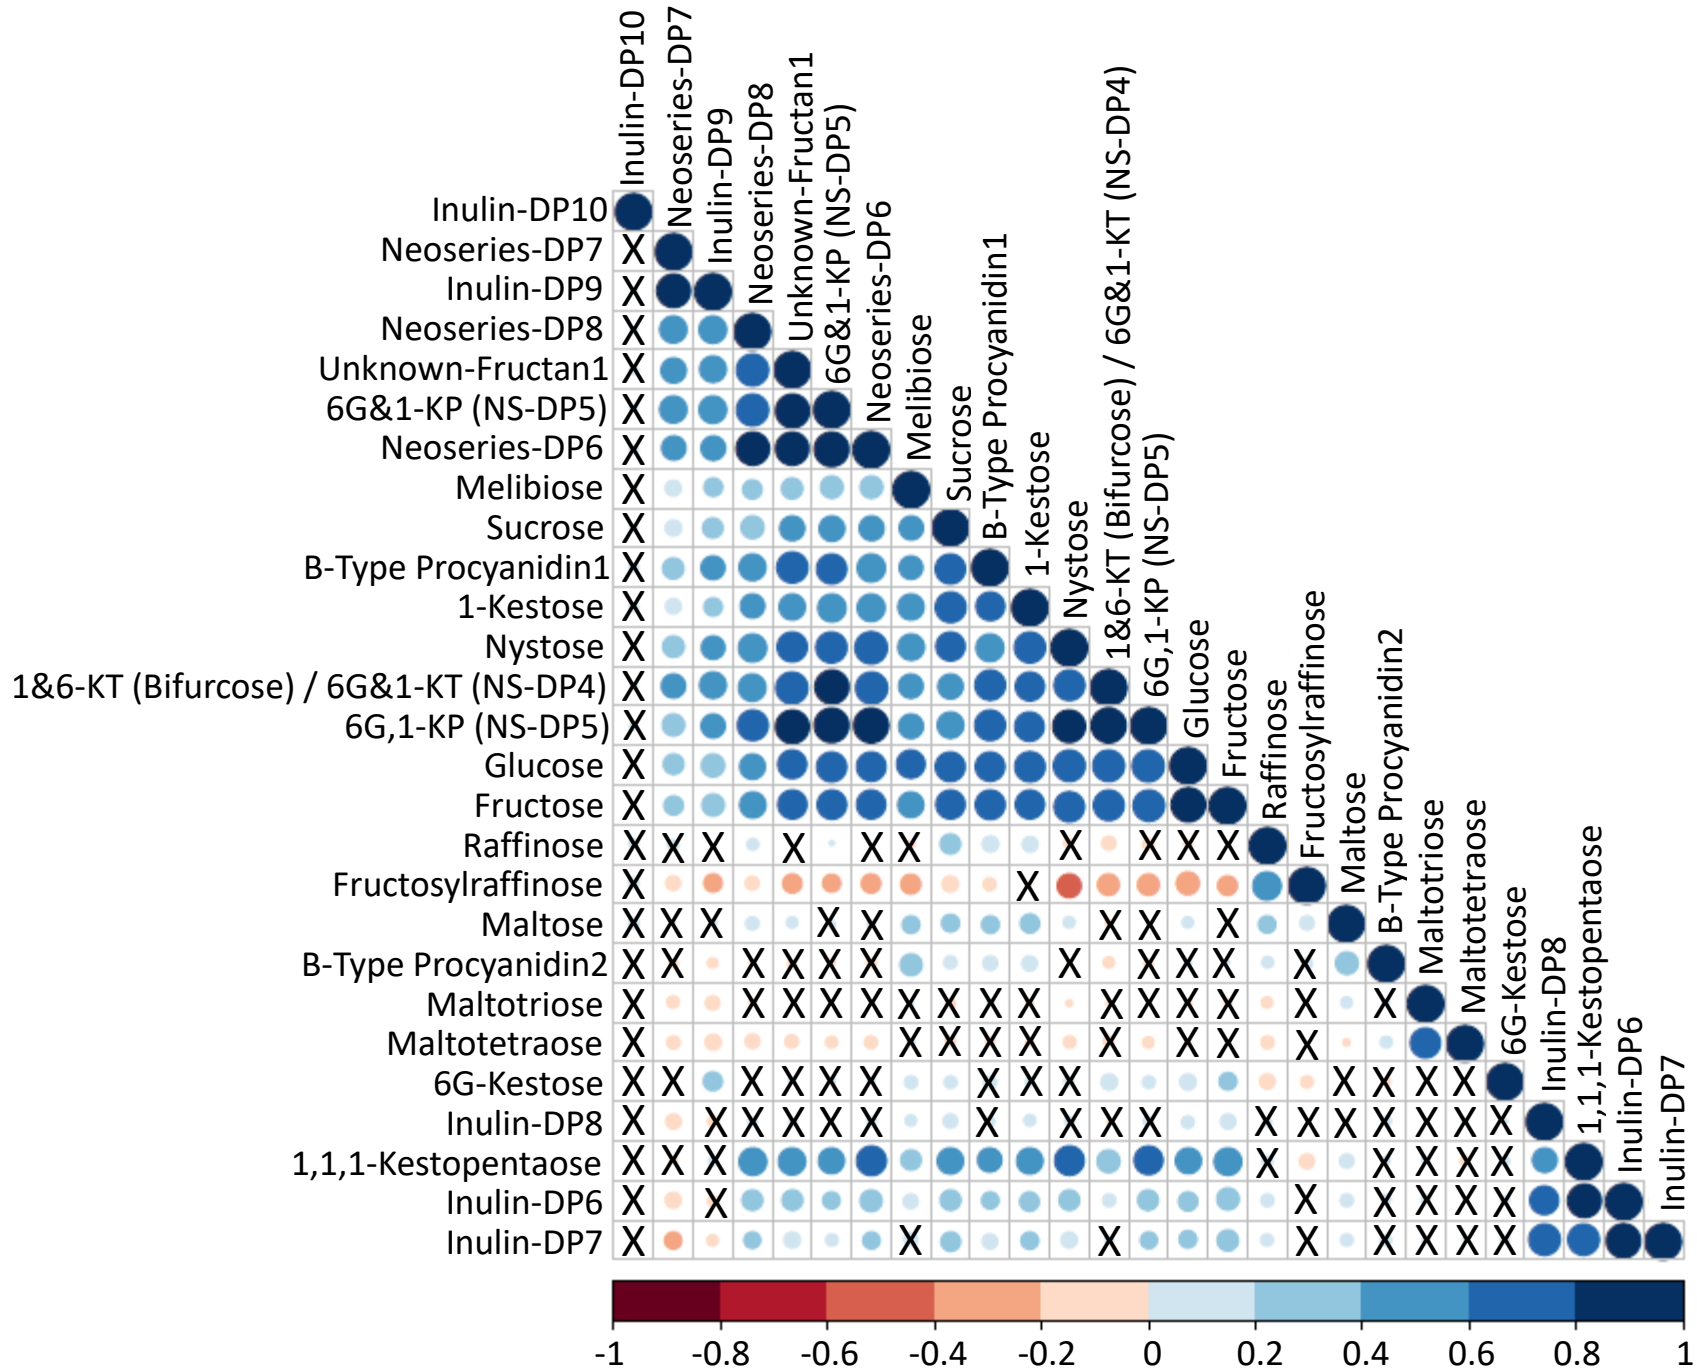

**Figure 2:** Correlation pattern among metabolites. Pair-wise Pearson correlations are shown in a heat map representation, whereas metabolites are sorted according to correlation-based hierarchical cluster analysis. High positive correlations are represented by dark blue and negative ones by red circles, whereas the circle diameter is indicative for the strength of the correlation. X-not significantly correlated ( $p>0.05$ ). The raw data are presented in Table S4.

**(A)**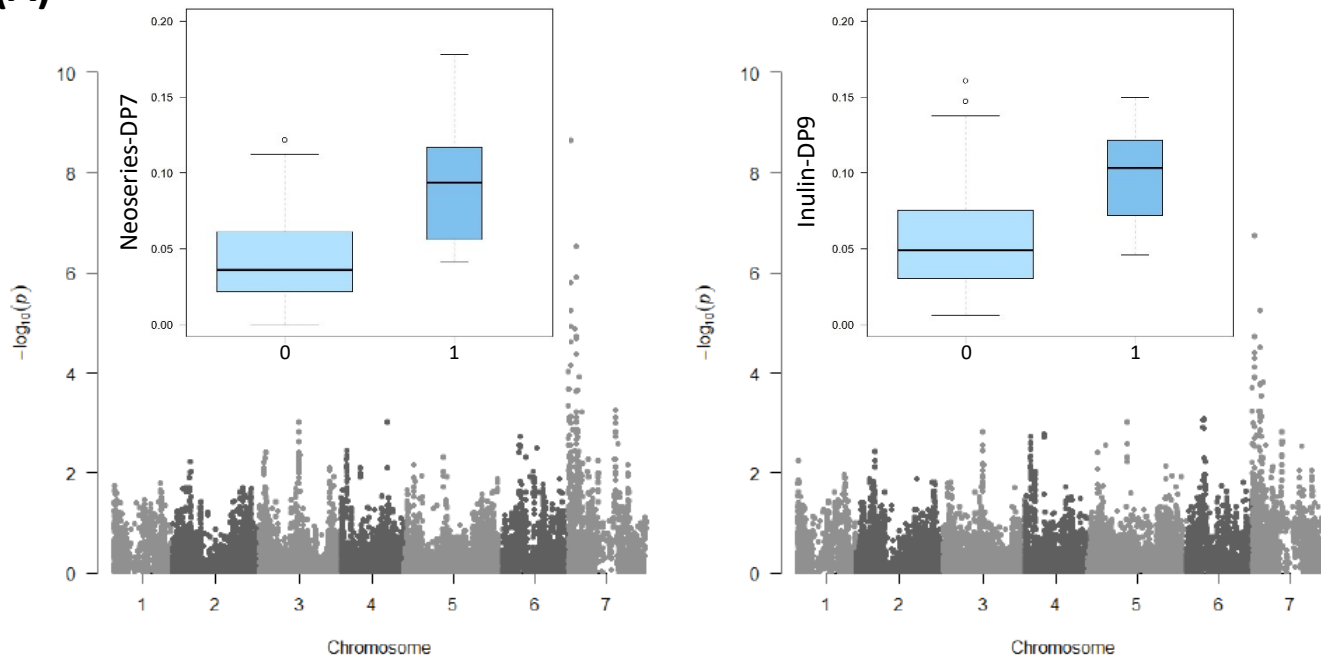**(B)**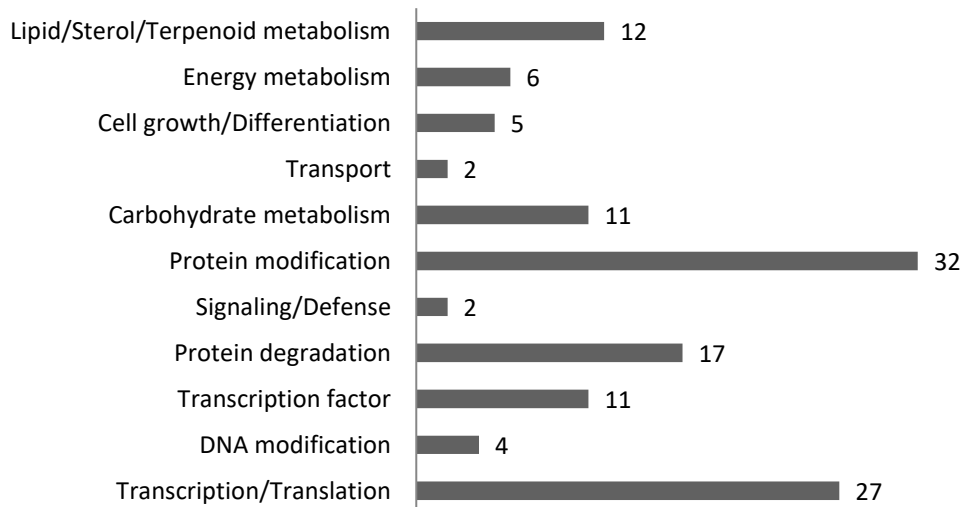

**Figure 3:** Results of the GWA scan. (A) Manhattan plots are shown for the two fructans neoserries-DP7 and inulin-DP9. The  $-\log_{10}(p)$  is shown on the y-axis and the 7 barley chromosomes are shown on the x-axis. Marker-trait association analysis was based on mean integrated peak areas. Integrated box plots show information for the top SNP (JHI-Hv50k-2016-438638). The variable alleles found (A and G) are shown on the x-axis. The y-axis shows the median of the metabolite amount for all lines with the respective allele variant; the width of the box is indicative for the number of lines with this particular allele. The false discovery rate significance threshold =  $-\log_{10}(p)$  6.02. (B) Assembling of the annotated gene models from the significant QTL region according to functional categories as obtained from the UniProt database (<https://www.uniprot.org/uniprot/>, June 2019). Numbers represent the count of gene models with the respective functional annotation.

***HORVU7Hr1G000250.3 (1-FFT)***

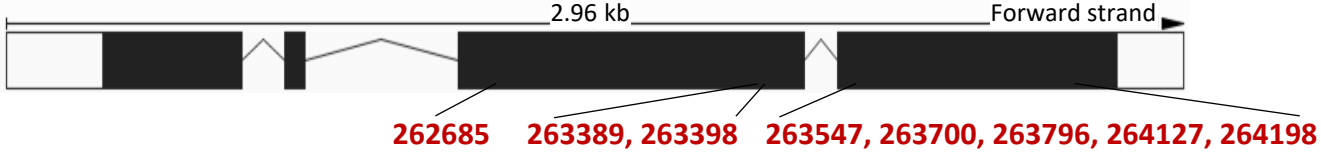

***HORVU7Hr1G000260.2 (1-SST)***

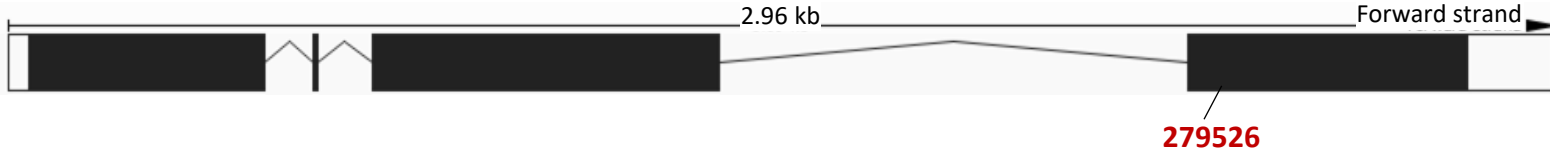

***HORVU7Hr1G000270.1 (6G-FFT)***

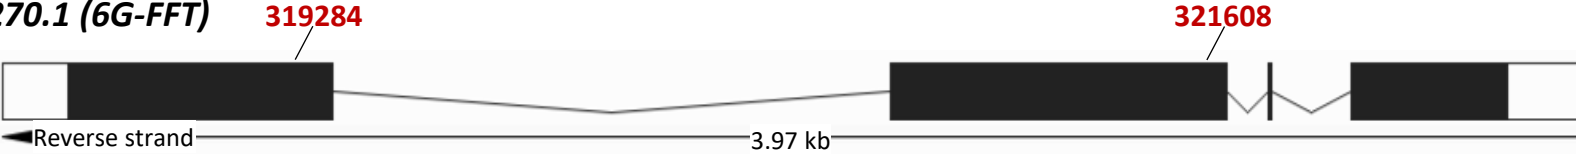

***HORVU7Hr1G001070.17 (VI-1)***

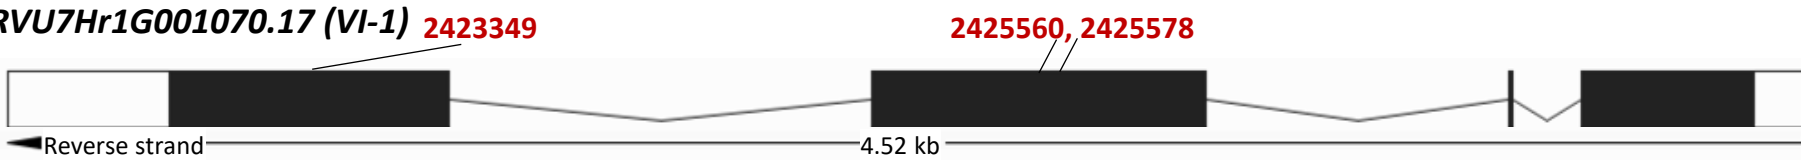

**Figure 4:** Location of non-synonymous SNPs in fructan biosynthesis candidate genes. All significant causal SNPs (position assigned in bold red) are located within functional protein coding regions of the genes (black regions of the transcripts). All identified SNPs are presented in Table S6 and box plots for significant effects are shown in Figure S5. For *6-SFT* no SNP was identified.

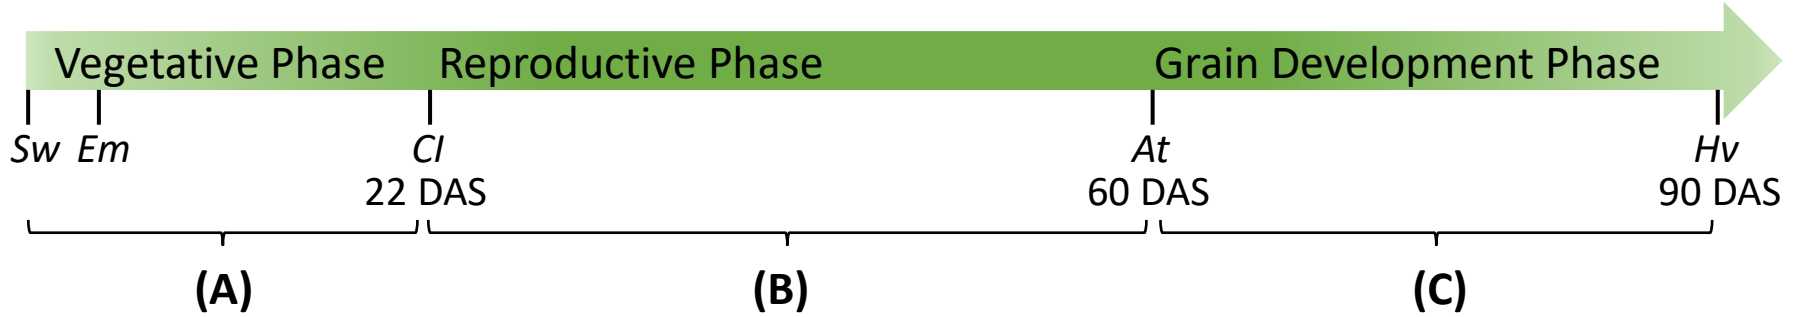

(A)

**Germinating Grain**

|            | 0  | 24  | 48 | 72 | 96 HAI |
|------------|----|-----|----|----|--------|
| 1-FFT      | 2  | 67  | 26 | 20 | 32     |
| 1-SST      | 18 | 232 | 67 | 68 | 113    |
| 6G-FFT     | 4  | 2   | 0  | 0  | 0      |
| 6-SFT      | 0  | 0   | 0  | 0  | 0      |
| VI-1       | 0  | 0   | 2  | 1  | 0      |
| 6-FEH      | 0  | 1   | 2  | 2  | 1      |
| 6-FEH/CW12 | 0  | 0   | 0  | 0  | 0      |
| 1-FEH      | 6  | 25  | 41 | 25 | 16     |

**Seedling**

|            | GE  | Root | Shoot |
|------------|-----|------|-------|
| 1-FFT      | 49  | 34   | 59    |
| 1-SST      | 239 | 212  | 268   |
| 6G-FFT     | 0   | 0    | 0     |
| 6-SFT      | 38  | 19   | 80    |
| VI-1       | 134 | 79   | 42    |
| 6-FEH      | 20  | 67   | 18    |
| 6-FEH/CW12 | 0   | 0    | 0     |
| 1-FEH      | 21  | 24   | 23    |

**Germinating Grain Tissues**

|            | Proximal Aleurone |     |     |     |    | Middle Aleurone |    |     |     |    | Distal Aleurone |    |    |    |    | Embryo |     |     |     |     | Scutellum |    |    |    |        |
|------------|-------------------|-----|-----|-----|----|-----------------|----|-----|-----|----|-----------------|----|----|----|----|--------|-----|-----|-----|-----|-----------|----|----|----|--------|
|            | 0                 | 24  | 48  | 72  | 96 | 0               | 24 | 48  | 72  | 96 | 0               | 24 | 48 | 72 | 96 | 0      | 24  | 48  | 72  | 96  | 0         | 24 | 48 | 72 | 96 HAI |
| 1-FFT      | 0                 | 0   | 0   | 0   | 1  | 0               | 0  | 0   | 0   | 0  | 0               | 0  | 0  | 0  | 0  | 5      | 138 | 35  | 35  | 80  | 0         | 5  | 1  | 1  | 21     |
| 1-SST      | 0                 | 1   | 0   | 1   | 1  | 0               | 0  | 0   | 0   | 0  | 0               | 0  | 0  | 0  | 0  | 38     | 475 | 104 | 142 | 243 | 5         | 52 | 3  | 3  | 10     |
| 6G-FFT     | 19                | 3   | 1   | 1   | 1  | 18              | 12 | 3   | 1   | 0  | 18              | 14 | 4  | 2  | 1  | 0      | 0   | 0   | 0   | 0   | 0         | 0  | 0  | 0  | 0      |
| 6-SFT      | 0                 | 0   | 0   | 0   | 0  | 0               | 0  | 0   | 0   | 0  | 0               | 0  | 0  | 0  | 0  | 0      | 0   | 0   | 0   | 0   | 0         | 0  | 0  | 0  | 0      |
| VI-1       | 0                 | 0   | 0   | 0   | 0  | 0               | 0  | 0   | 0   | 0  | 0               | 0  | 0  | 0  | 0  | 0      | 0   | 2   | 1   | 0   | 0         | 0  | 2  | 1  | 0      |
| 6-FEH      | 0                 | 1   | 2   | 3   | 0  | 0               | 0  | 0   | 0   | 0  | 0               | 0  | 0  | 0  | 0  | 1      | 1   | 2   | 2   | 0   | 0         | 1  | 1  | 1  | 0      |
| 6-FEH/CW12 | 0                 | 0   | 0   | 0   | 0  | 0               | 0  | 0   | 0   | 0  | 0               | 0  | 0  | 0  | 0  | 0      | 0   | 0   | 0   | 0   | 0         | 2  | 1  | 0  | 0      |
| 1-FEH      | 7                 | 163 | 180 | 107 | 18 | 4               | 8  | 122 | 140 | 65 | 4               | 3  | 53 | 75 | 26 | 7      | 11  | 5   | 3   | 3   | 12        | 33 | 21 | 17 | 8      |



**(B)****Vegetative Tissues**

|            | EPI | ROO2 | RAC | LEM | LOD | PAL | INF2 | NOD |
|------------|-----|------|-----|-----|-----|-----|------|-----|
| 1-FFT      | 503 | 253  | 341 | 169 | 328 | 236 | 446  | 373 |
| 1-SST      | 566 | 127  | 108 | 337 | 356 | 172 | 312  | 422 |
| 6G-FFT     | 0   | 0    | 0   | 0   | 0   | 0   | 76   | 0   |
| 6-SFT      | 234 | 436  | 449 | 153 | 292 | 374 | 416  | 262 |
| VI-1       | 551 | 154  | 631 | 735 | 223 | 387 | 252  | 385 |
| 6-FEH      | 509 | 134  | 389 | 675 | 234 | 852 | 351  | 90  |
| 6-FEH/CWI2 | 346 | 0    | 204 | 349 | 161 | 709 | 0    | 63  |
| 1-FEH      | 219 | 169  | 89  | 215 | 565 | 301 | 318  | 86  |

**Meiosis Stages**

|            | A.Pre | A.LepZyg | M.LepZyg | A.MetTet | A.PacDip | M.PacDip |
|------------|-------|----------|----------|----------|----------|----------|
| 1-FFT      | 3     | 1        | 1        | 0        | 2        | 0        |
| 1-SST      | 13    | 33       | 34       | 32       | 15       | 15       |
| 6G-FFT     | 0     | 0        | 0        | 0        | 0        | 0        |
| 6-SFT      | 5     | 61       | 41       | 62       | 15       | 9        |
| VI-1       | 0     | 0        | 0        | 0        | 0        | 0        |
| 6-FEH      | 40    | 19       | 66       | 69       | 41       | 54       |
| 6-FEH/CWI2 | 0     | 0        | 0        | 0        | 0        | 0        |
| 1-FEH      | 17    | 16       | 27       | 25       | 20       | 27       |

**Pistil Development**

|            | W8 | W8.5 | W9  | W9.5 | W10 |
|------------|----|------|-----|------|-----|
| 1-FFT      | 3  | 4    | 4   | 6    | 10  |
| 1-SST      | 94 | 153  | 172 | 228  | 238 |
| 6G-FFT     | 0  | 0    | 0   | 0    | 0   |
| 6-SFT      | 15 | 39   | 93  | 379  | 460 |
| VI-1       | 0  | 0    | 1   | 4    | 16  |
| 6-FEH      | 10 | 11   | 11  | 15   | 8   |
| 6-FEH/CWI2 | 0  | 0    | 0   | 0    | 0   |
| 1-FEH      | 10 | 11   | 12  | 12   | 14  |

**Pistil Tissues**

|            | Nucellus |      |     | Integument |      |     | Ovary wall |      |     | ES   | EC+CC |     | ANT  |     | Chalaza |
|------------|----------|------|-----|------------|------|-----|------------|------|-----|------|-------|-----|------|-----|---------|
|            | W8.5*    | W9.5 | W10 | W8.5       | W9.5 | W10 | W8.5       | W9.5 | W10 | W9.5 | W9.5  | W10 | W9.5 | W10 | W10     |
| 1-FFT      | 0        | 0    | 0   | 0          | 0    | 0   | 0          | 1    | 2   | 0    | 0     | 0   | 0    | 0   | 2       |
| 1-SST      | 3        | 5    | 1   | 3          | 4    | 4   | 11         | 109  | 101 | 78   | 190   | 199 | 92   | 1   | 4       |
| 6G-FFT     | 0        | 0    | 0   | 0          | 0    | 0   | 0          | 0    | 0   | 0    | 0     | 0   | 0    | 0   | 0       |
| 6-SFT      | 0        | 0    | 0   | 0          | 0    | 0   | 0          | 7    | 99  | 0    | 44    | 44  | 0    | 0   | 0       |
| VI-1       | 0        | 0    | 0   | 0          | 0    | 0   | 0          | 0    | 0   | 0    | 0     | 0   | 0    | 0   | 0       |
| 6-FEH      | 0        | 0    | 0   | 0          | 0    | 0   | 0          | 0    | 0   | 0    | 0     | 0   | 0    | 0   | 0       |
| 6-FEH/CWI2 | 0        | 0    | 0   | 0          | 0    | 0   | 0          | 0    | 0   | 0    | 0     | 0   | 0    | 0   | 0       |
| 1-FEH      | 1        | 2    | 0   | 1          | 2    | 1   | 1          | 2    | 3   | 0    | 5     | 1   | 2    | 1   | 2       |

\* Nucellus and embryo sac

### (C) Grain Development Stages

|            | 7   | 9   | 11  | 13 | 15 | 20 DAP |
|------------|-----|-----|-----|----|----|--------|
| 1-FFT      | 9   | 8   | 6   | 5  | 2  | 1      |
| 1-SST      | 156 | 118 | 44  | 21 | 18 | 4      |
| 6G-FFT     | 0   | 2   | 9   | 14 | 32 | 32     |
| 6-SFT      | 791 | 525 | 126 | 35 | 11 | 7      |
| VI-1       | 0   | 0   | 0   | 0  | 1  | 0      |
| 6-FEH      | 1   | 0   | 0   | 0  | 2  | 1      |
| 6-FEH/CWI2 | 1   | 0   | 0   | 0  | 1  | 0      |
| 1-FEH      | 14  | 15  | 19  | 16 | 15 | 7      |

### Grain Development Tissues

|            | Pericarp |     |    |     | Aleurone |     |    |    | SA  |     |    |    | SE  |    |    |        |
|------------|----------|-----|----|-----|----------|-----|----|----|-----|-----|----|----|-----|----|----|--------|
|            | 7        | 9   | 13 | 25  | 7*       | 9   | 13 | 25 | 7   | 9   | 13 | 25 | 7   | 9  | 13 | 25 DAP |
| 1-FFT      | 10       | 6   | 8  | 2   | 0        | 1   | 1  | 0  | 1   | 2   | 1  | 0  | 0   | 0  | 0  | 0      |
| 1-SST      | 68       | 61  | 4  | 2   | 47       | 53  | 3  | 0  | 21  | 25  | 0  | 0  | 7   | 6  | 0  | 0      |
| 6G-FFT     | 0        | 0   | 0  | 0   | 0        | 0   | 1  | 3  | 0   | 0   | 0  | 0  | 0   | 0  | 0  | 0      |
| 6-SFT      | 212      | 267 | 0  | 1   | 203      | 223 | 0  | 0  | 473 | 456 | 0  | 5  | 320 | 85 | 1  | 3      |
| VI-1       | 0        | 0   | 3  | 1   | 0        | 0   | 0  | 0  | 0   | 0   | 0  | 0  | 0   | 0  | 0  | 0      |
| 6-FEH      | 0        | 0   | 8  | 533 | 0        | 0   | 5  | 7  | 0   | 0   | 0  | 0  | 0   | 0  | 1  | 0      |
| 6-FEH/CWI2 | 0        | 0   | 0  | 0   | 0        | 0   | 0  | 0  | 0   | 0   | 0  | 0  | 0   | 0  | 0  | 3      |
| 1-FEH      | 15       | 14  | 5  | 51  | 40       | 41  | 9  | 1  | 1   | 1   | 0  | 0  | 1   | 4  | 4  | 0      |

\* 7 DAP sample not aleurone yet

### Senescing Leaf

|            | SN  |
|------------|-----|
| 1-FFT      | 434 |
| 1-SST      | 138 |
| 6G-FFT     | 0   |
| 6-SFT      | 477 |
| VI-1       | 194 |
| 6-FEH      | 551 |
| 6-FEH/CWI2 | 137 |
| 1-FEH      | 169 |

|                    |           |                |           |
|--------------------|-----------|----------------|-----------|
| <b>TPM Scale:</b>  | Low 0-10  | Medium 10-250  | High >250 |
| <b>FPKM Scale:</b> | Low 0-100 | Medium 100-500 | High >500 |

0 in white box, no expression detected; 0 in light blue or light grey box, expression close to zero detected

**Figure 5:** Transcript expression of the fructan biosynthesis genes in barley across plant development and in various tissues. Data sets included in the analysis are detailed in the materials and methods section. Genes included comprise the five fructan biosynthesis genes from the detected significant QTL region (*1-FFT*, HORVU7Hr1G000250; *1-SST*, HORVU7Hr1G000260; *6G-FFT*, HORVU7Hr1G000270; *6-SFT*, HORVU7Hr1G001040; and *VI-1*, HORVU7Hr1G001070) as well as three known fructan hydrolyase encoding genes (*6-FEH*, HORVU2Hr1G109120; *6-FEH/CWI2*, HORVU2Hr1G118820; and *1-FEH*, HORVU6Hr1g011260). Expression levels are colour coded, whereas different scales were used for TPM and FPKM values as indicated in the legend. (A) shows expression levels in the early vegetative phase for whole germinated grain tissues and for isolated germinated grain tissues from 0 to 96 hours after imbibition (HAI). Also, expression levels in seedling are shown for germinated embryo (GE), root and shoot. (B) shows data from the reproductive phase. Vegetative tissues included are: EPI, epidermal strips (4 weeks after planting, W4); ROO2, roots (W4); RAC, inflorescences, rachis (W5); LEM, inflorescences, lemma (W6); LOD, inflorescences, lodicule (W6); PAL, dissected inflorescences, palea (W6); INF2, inflorescence (10 mm); and NOD, internode. Meiosis stages included are: A.Pre, premeiosis anthers; A.LepZyg, leptotene/zygotene anthers; M.Lep/Zyg leptotene/zygotene meiocytes; A.MetTet, metaphaseI-tetrad anthers; A.PacDip, pachytene/diplotene anthers; M.PacDip, pachytene/diplotene meiocytes. Waddington (W) stages for pistil development are: W8; W8.5; W9; W9.5; and W10. Isolated pistil tissues are: nucellus (including nucellus and embryo sac for W8.5); integument; ovary wall; ES, embryo sac; EC+CC, egg apparatus and central cell; ANT, antipodal cells; and chalaza. (C) shows data from the grain development phase for whole developing grain (from 7 to 20 days after pollination, DAP) and for isolated developing grain tissues from 7 to 25 DAP. Abbreviations are SA, sub-aleurone/outer starchy endosperm; and SE, starchy endosperm/inner starchy endosperm. Also, data from senescing leaf (SN) are presented. Other abbreviations are: At, anthesis; CI, collar initiation; Em, emergence; Hv, harvest; and Sw, sowing.

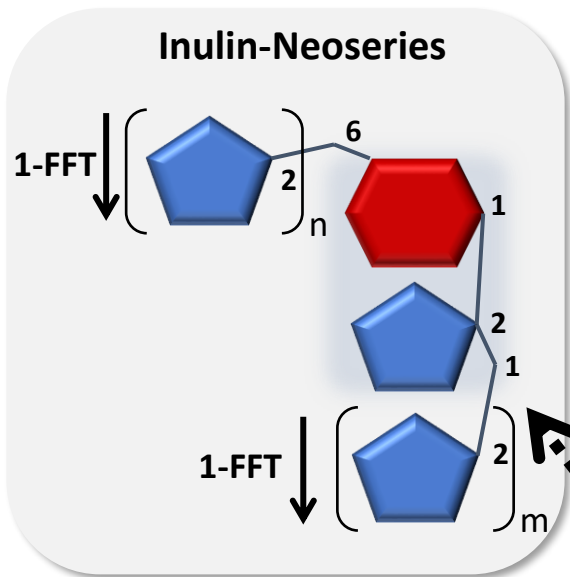

VI-1 (unknown role)

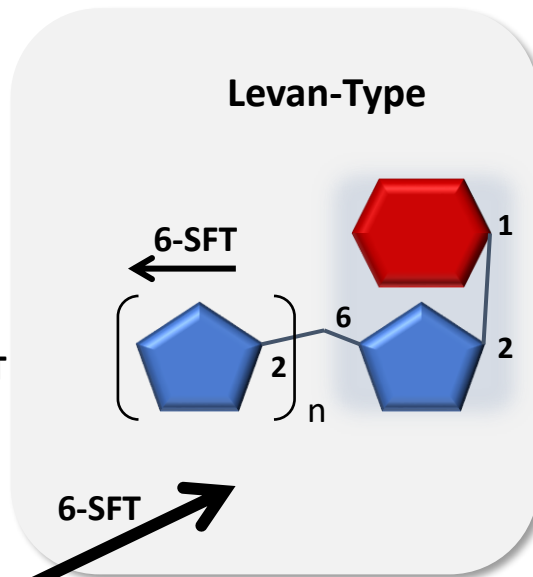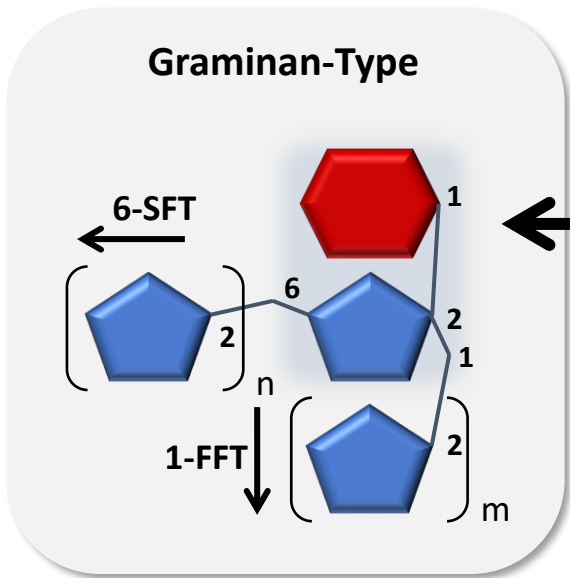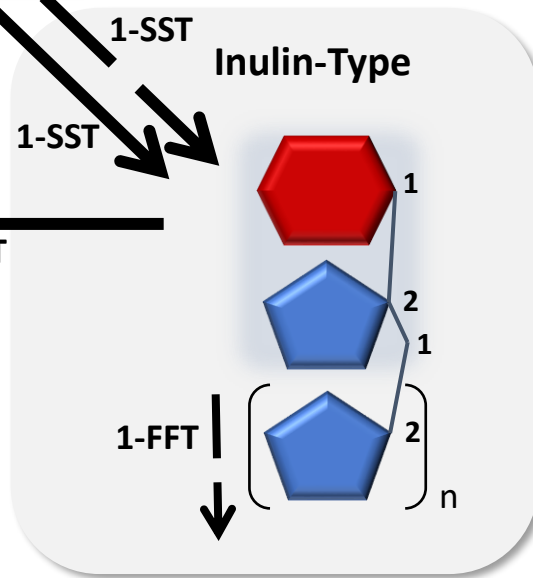

SUCROSE

**TFs associated with 1-FFT, 1-SST, 6-SFT:**

- *WD\_REPEATS\_REGION* domain-containing protein (HORVU7Hr1G000820.1),
- *Protein ALWAYS EARLY 3* (HORVU7Hr1G001120.1)
- *Two scarecrow-like protein genes* (HORVU7Hr1G001300.3, HORVU7Hr1G001310.1)

**TFs associated with 6G-FFT:**

- *WD\_REPEATS\_REGION* domain-containing protein (HORVU7Hr1G000820.1)
- *Scarecrow-like protein 22* (HORVU7Hr1G001310.1)
- *HTH myb-type domain-containing protein* (HORVU7Hr1G001830.3)

**TFs associated with VI-1:**

- *Protein ALWAYS EARLY 3* (HORVU7Hr1G001120.1)
- *Scarecrow-like protein 22* (HORVU7Hr1G001310.1)

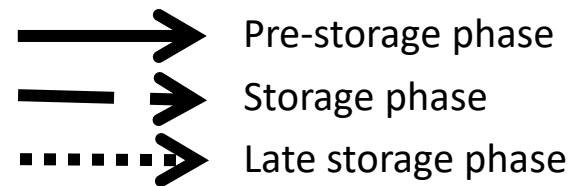

**Figure 6:** Fructan-types, suggested biosynthesis routes and potential regulators in developing barley grain. Specific spatiotemporal biosynthesis of oligofructans was observed for barley grains. Continuous bold arrows illustrate the major route of biosynthesis during the pre-storage phase (until 14 DAP) and the dashed bold arrows indicate the major route during the storage phase (until 20 DAP). During the pre-storage phase high transcript levels for *1-SST* and *6-SFT* were observed for the endosperm leading to an accumulation of 6-kestose and bifurcose. With transition to the storage phase a transcriptional switch was observed resulting in high transcript levels of *1-SST* in the nucellar projection (NP). *1-FFT* was found to be exclusively expressed in the NP during the storage phase. Induction of the inulin-type fructan biosynthesis pathway led to high amounts of 1-kestose and nystose accumulating in the endosperm cavity (Peukert *et al.*, 2014). The dotted bold arrow illustrates the major route of biosynthesis during the late storage phase with *6G-FFT* transcripts detected in the outer endosperm (from 30 DAP onwards, Figure 6), which matched the detection of neoserries-type oligofructans in mature barley grains (Figure 1). Transcription factors (TF) showing significant correlation of transcript expression pattern in developing grain with *1-FFT*, *1-SST* and *6-SFT* (positive), *6G-FFT* (negative), and *VI-1* (positive) are listed in the inserted text box. Inulin-neoserries represents linear fructans with  $\beta(2,1)$  &  $\beta(2,6)$  linked fructosyl units at the glucose (1F, 6G-di- $\beta$ -D-fructofuranosylsucrose is shown; m=1, n= 1), graminan-type represents branched fructans with  $\beta(2,1)$  &  $\beta(2,6)$  linked fructosyl units (bifurcose is shown; m= 1, n= 1), inulin-type illustrates linear fructans with  $\beta(2,1)$  linked fructosyl units (1-kestose is shown; n= 1); , and levan-type shows linear fructans with  $\beta(2,6)$  linked fructosyl units (6-kestose is shown; n= 1). The arrows indicate direction of further polymerisation. Abbreviations are: *1-FFT*, fructan:fructan 1-fructosyltransferase; *1-SST*, sucrose:sucrose 1-fructosyl-transferase; *6-SFT*, sucrose:fructan 6-fructosyltransferase; *6G-FFT*, fructan:fructan 6G-fructosyltransferase; *VI-1*, vacuolar invertase 1 (unknown role in developing grain).
